# Supplementary material for: The Effect of School Closure on Hand, Foot, and Mouth Disease Transmission in Singapore: A Modeling Approach
Source: PubMed Central journal article supplement (PMC6283473; doi:10.4269/ajtmh.18-0099), 2018-10-22

Outbreak 100

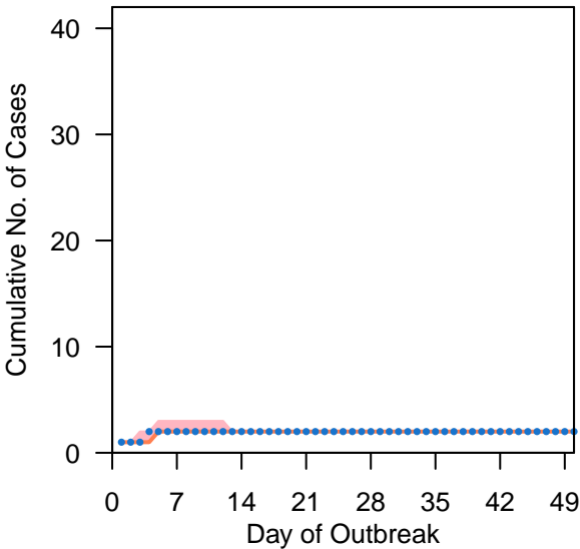

# Outbreak 200

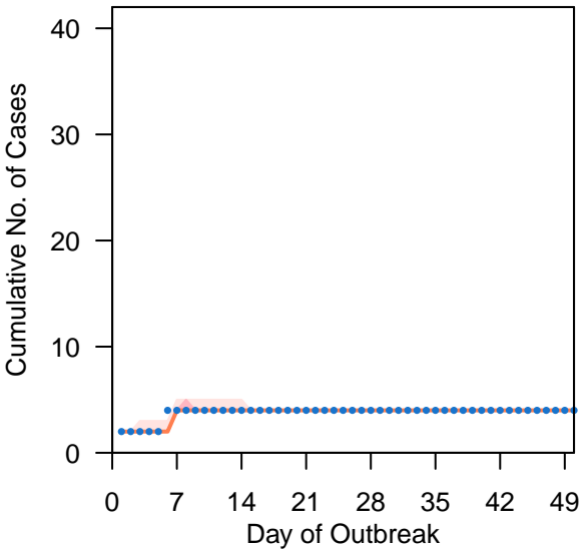

# Outbreak 300

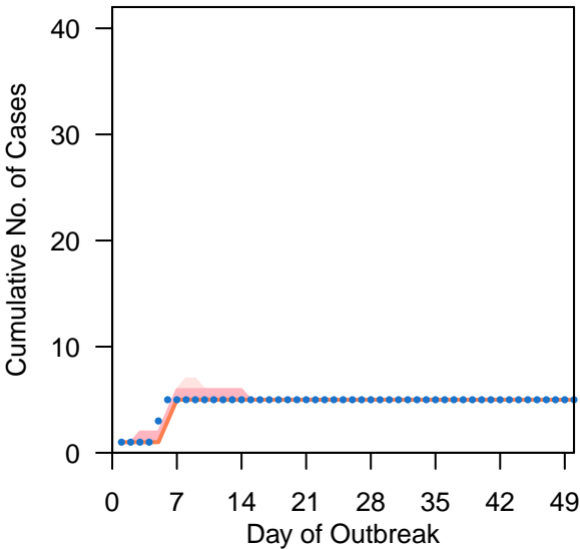

Outbreak 400

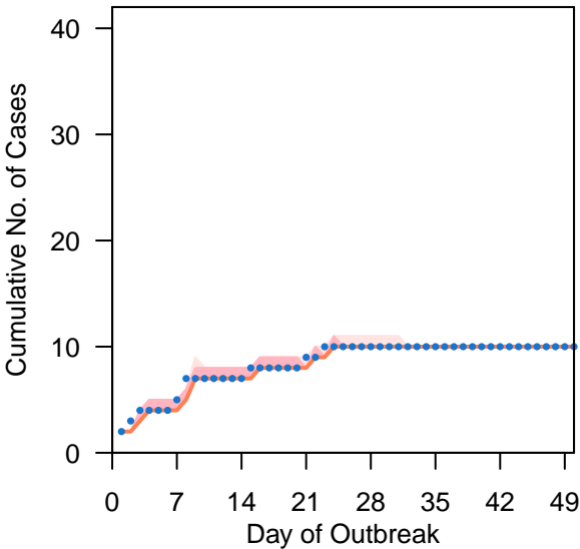

# Outbreak 500

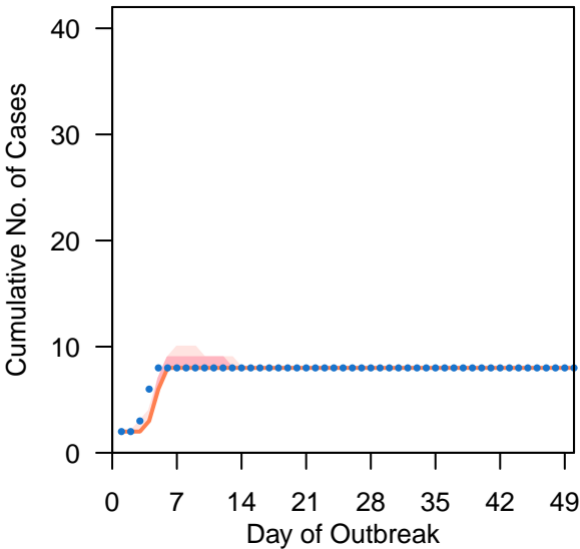

Outbreak 600

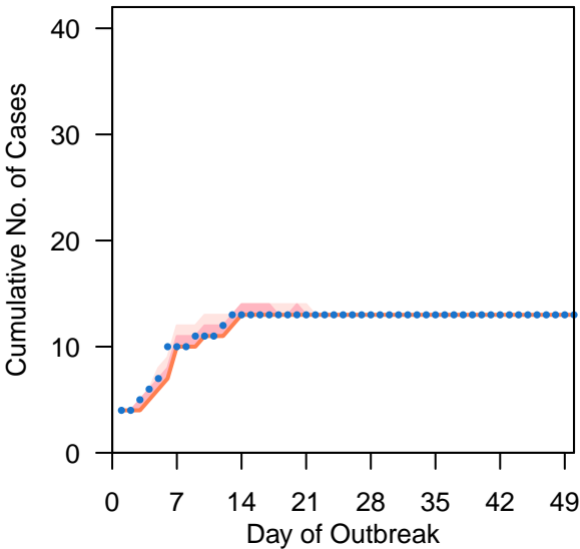

Outbreak 700

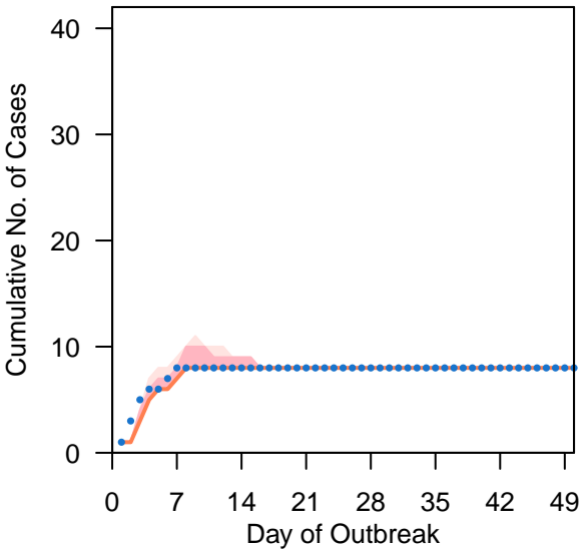

# Outbreak 800

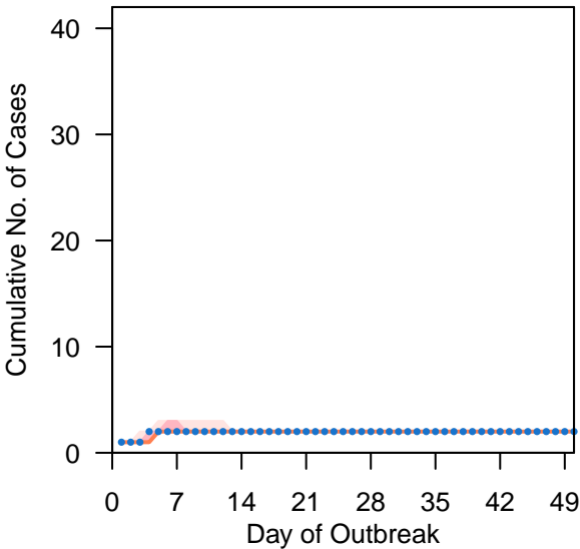



# Outbreak 900

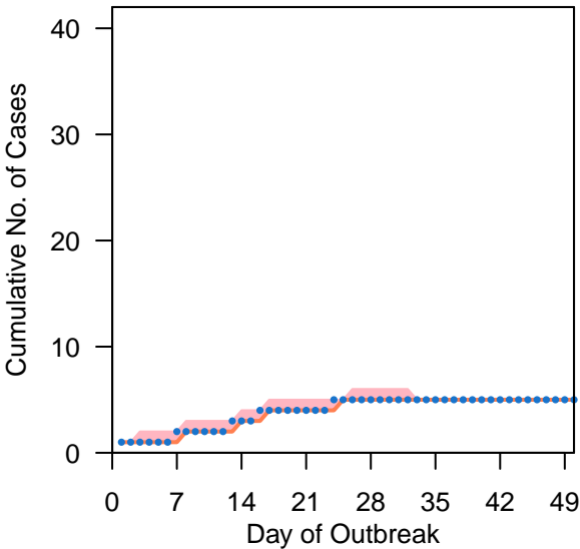

# Outbreak 1000

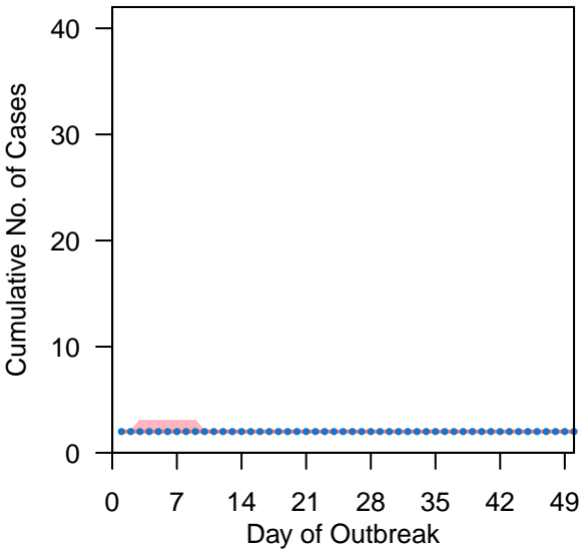

# Outbreak 1100

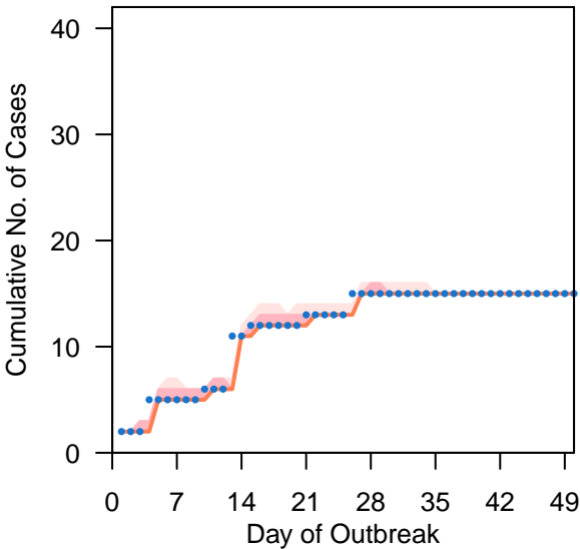

# Outbreak 1200

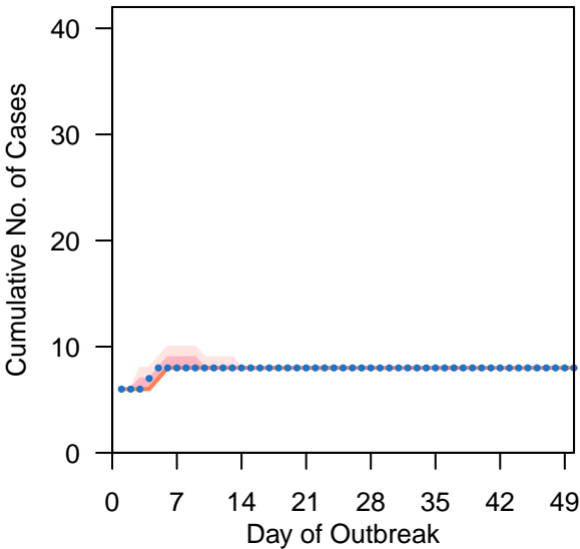

# Outbreak 1300

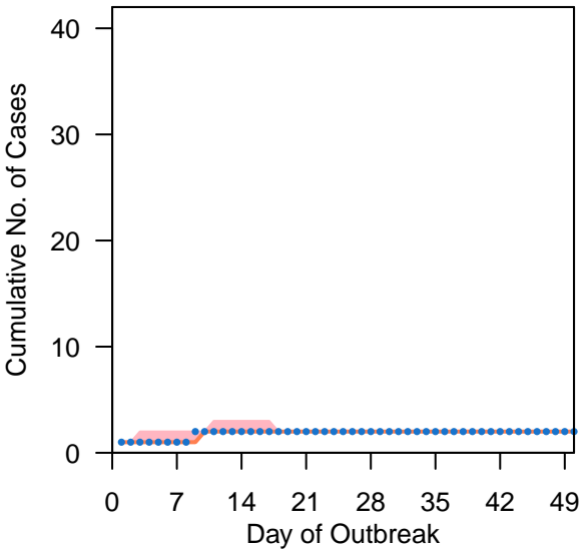

# Outbreak 1400

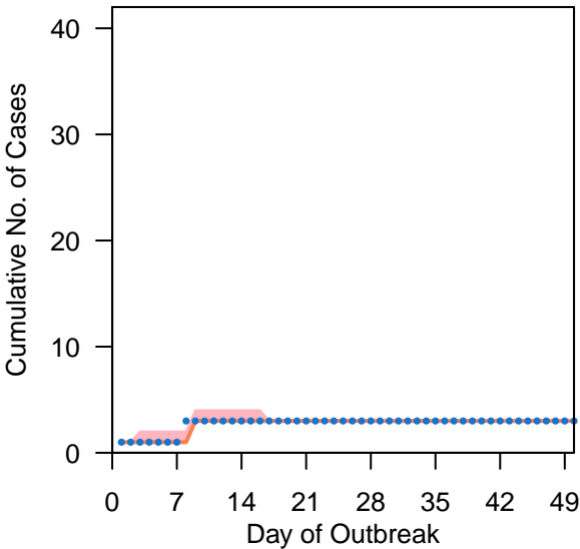

# Outbreak 1500

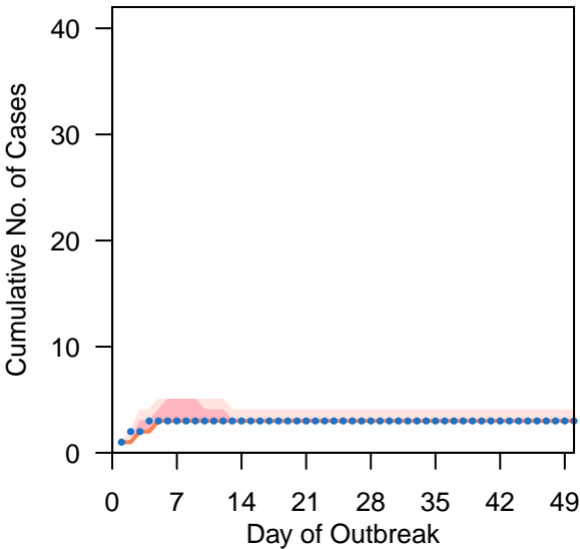

# Outbreak 1600

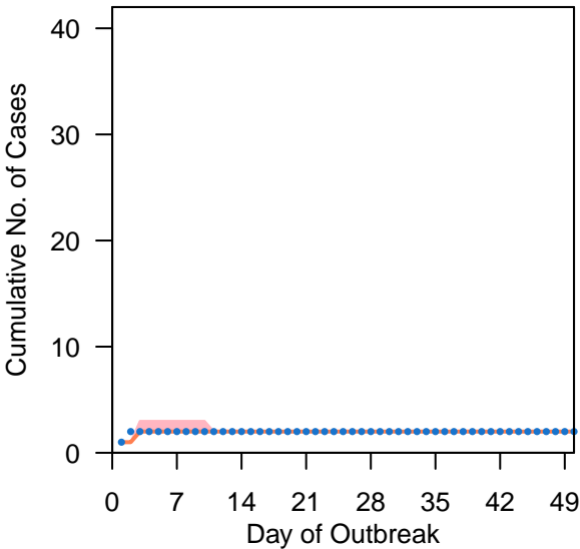



# Outbreak 1700

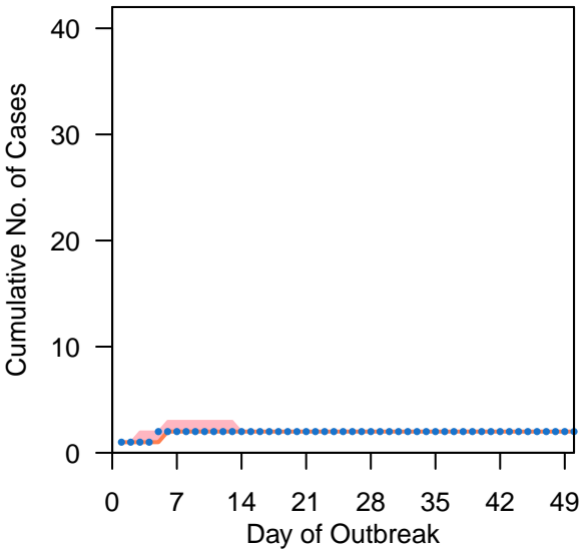

# Outbreak 1800

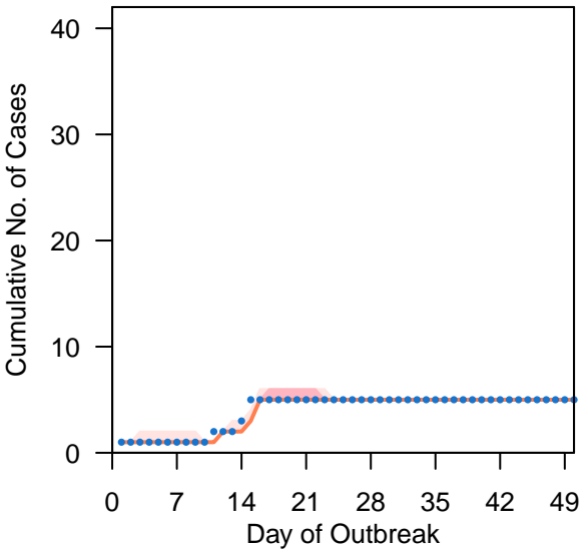

# Outbreak 1900

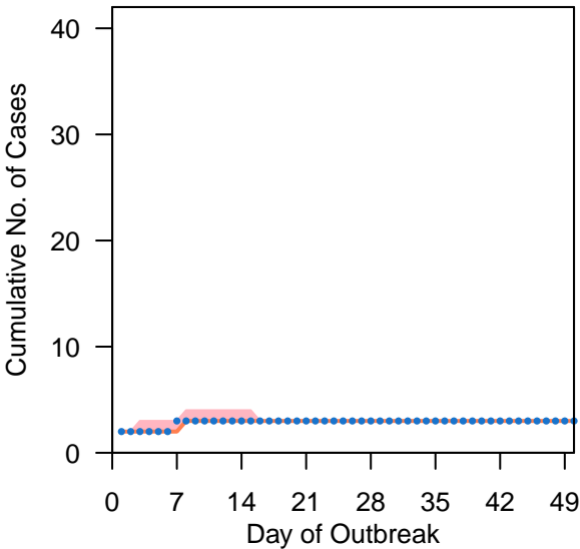

# Outbreak 2000



# Outbreak 2100

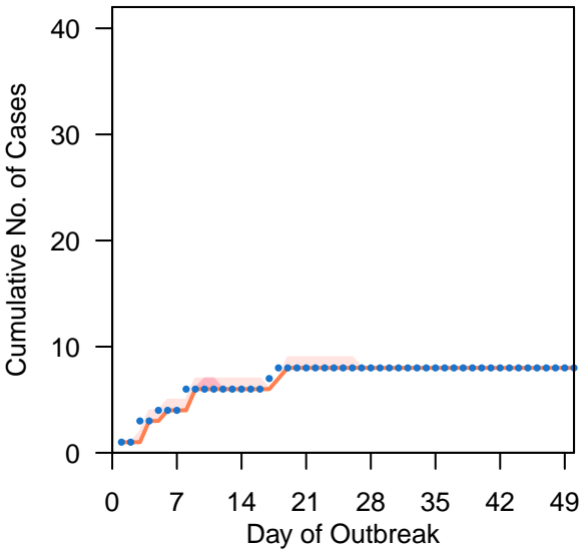

# Outbreak 2200

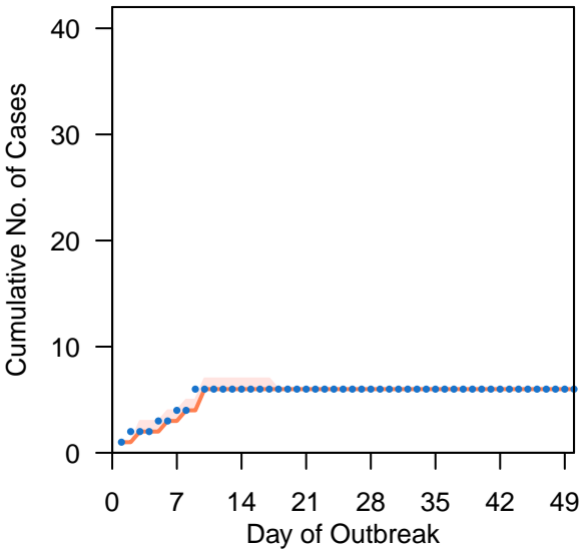

# Outbreak 2300

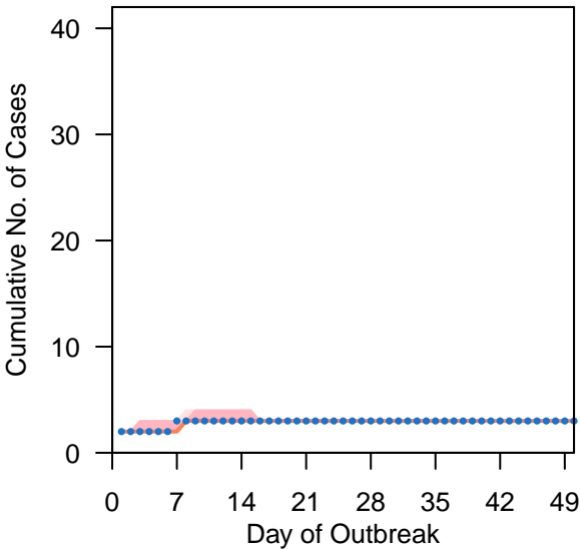

# Outbreak 2400

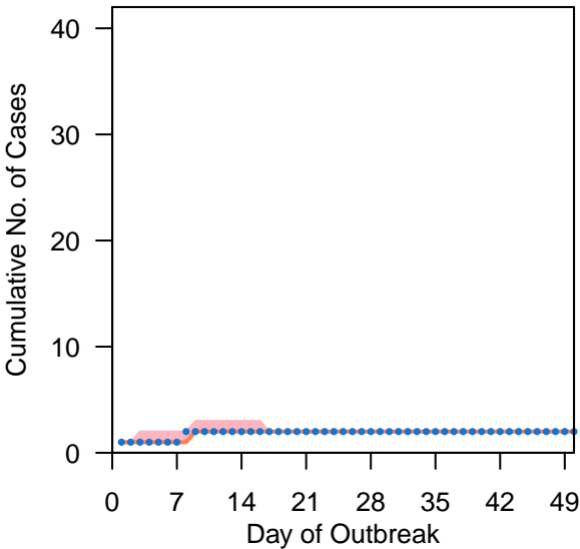



# Outbreak 2500

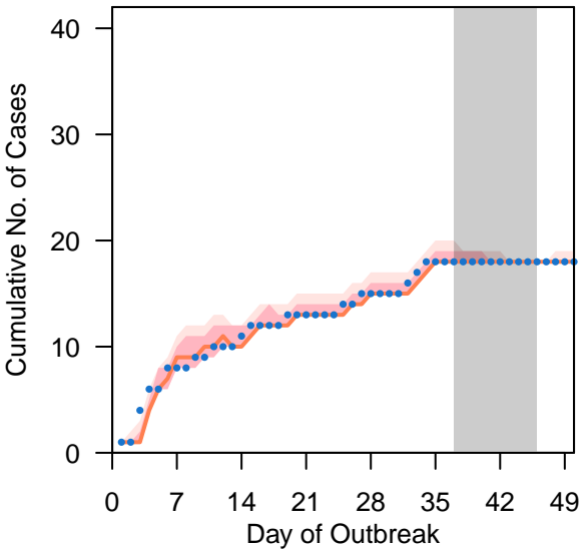

# Outbreak 2600

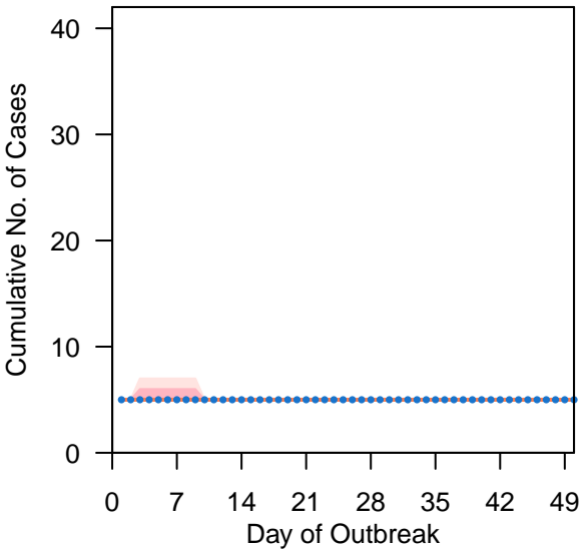

# Outbreak 2700

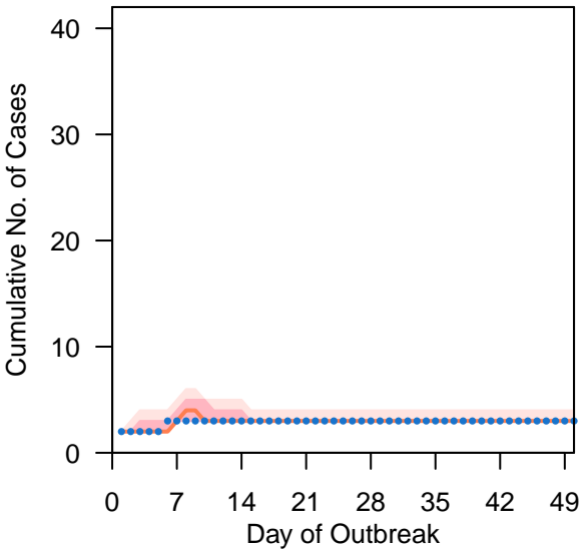

# Outbreak 2800

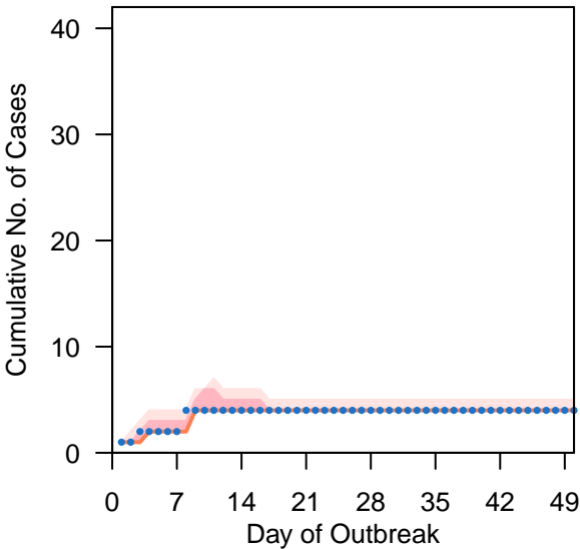

# Outbreak 2900

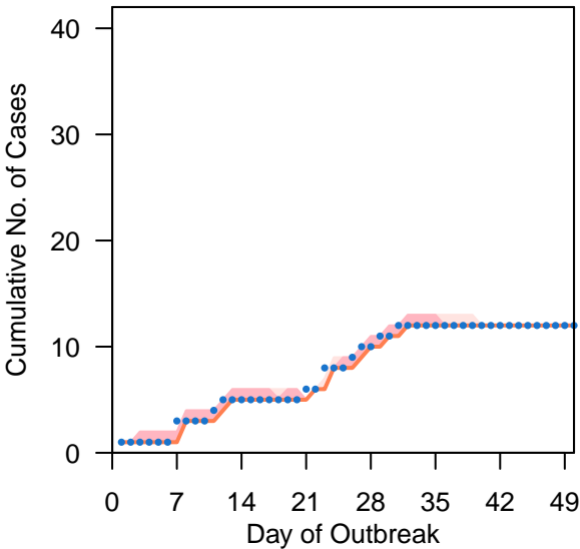

# Outbreak 3000



# Outbreak 3100

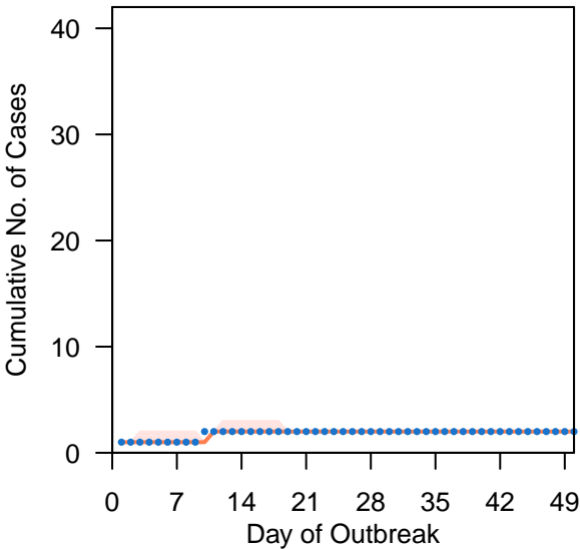

# Outbreak 3200

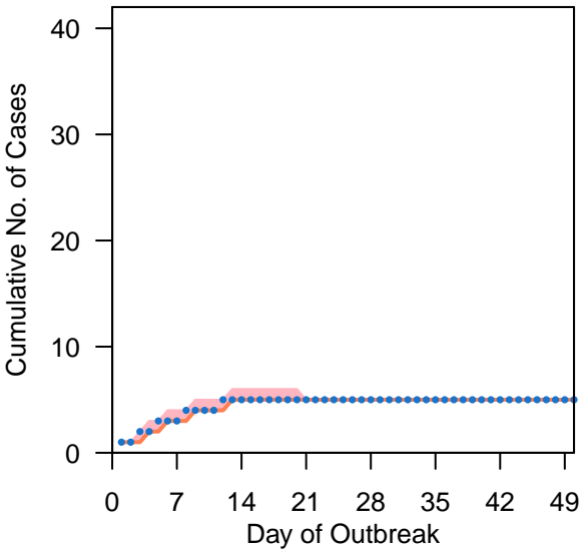



# Outbreak 3300

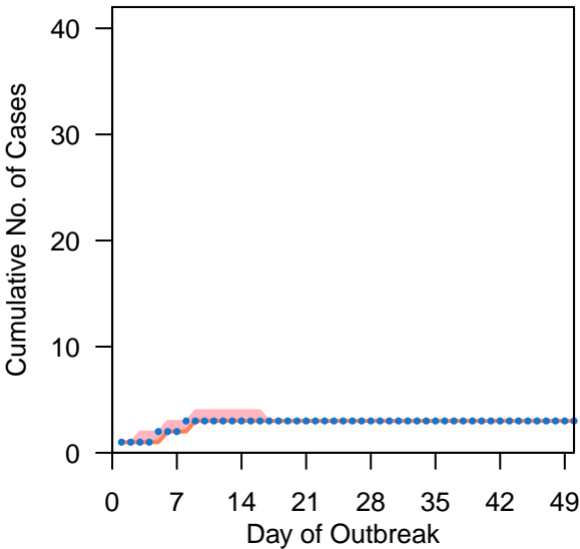

# Outbreak 3400

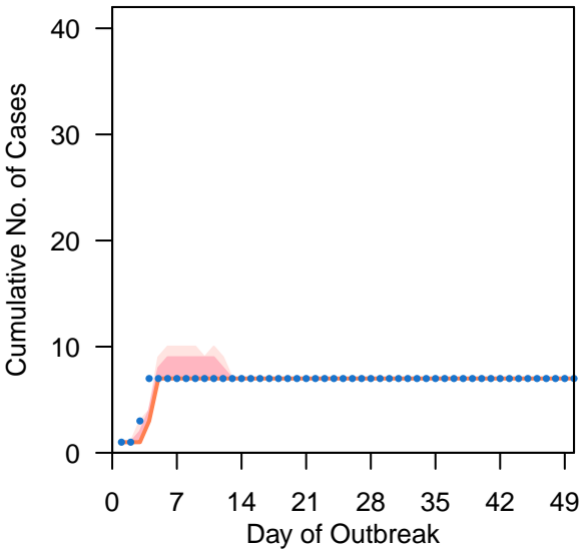

# Outbreak 3500

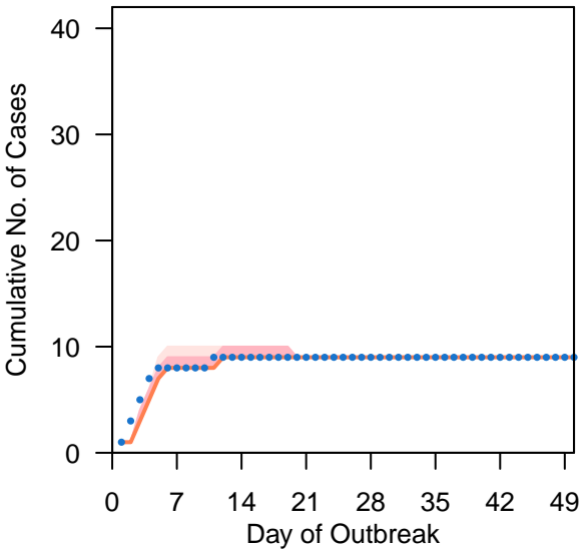

# Outbreak 3600

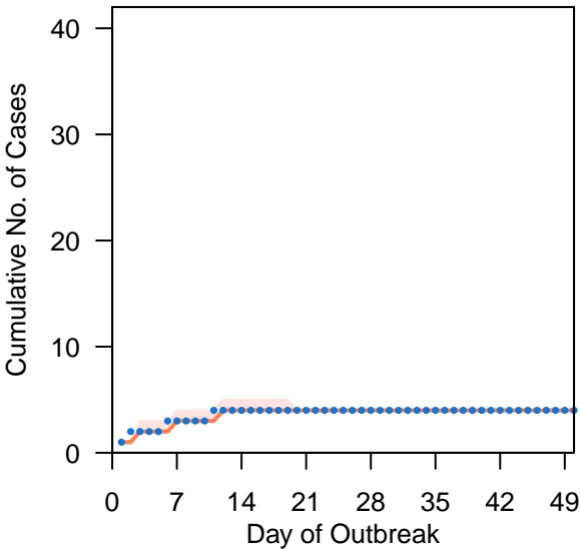

# Outbreak 3700

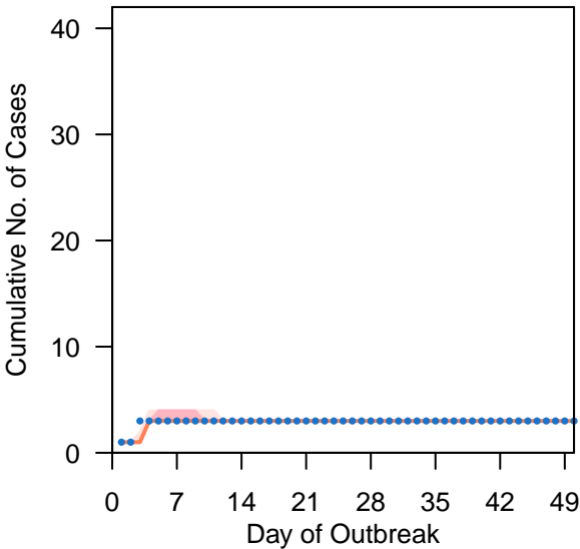

Outbreak 3800

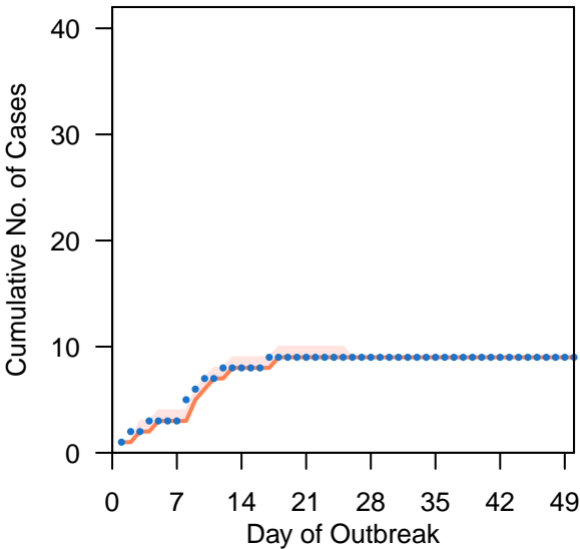

# Outbreak 3900

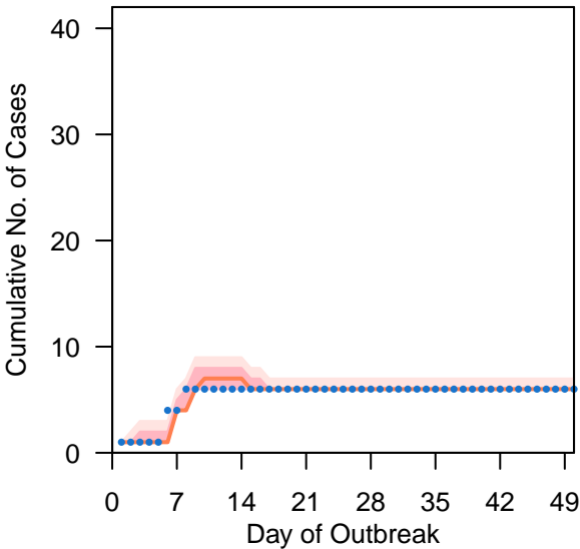

# Outbreak 4000

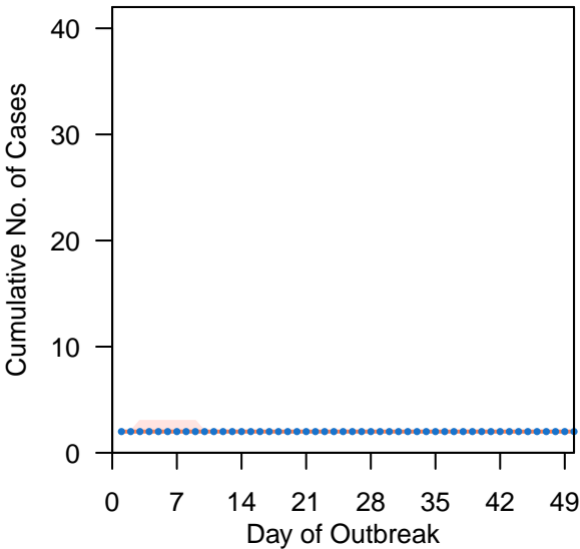



# Outbreak 4100

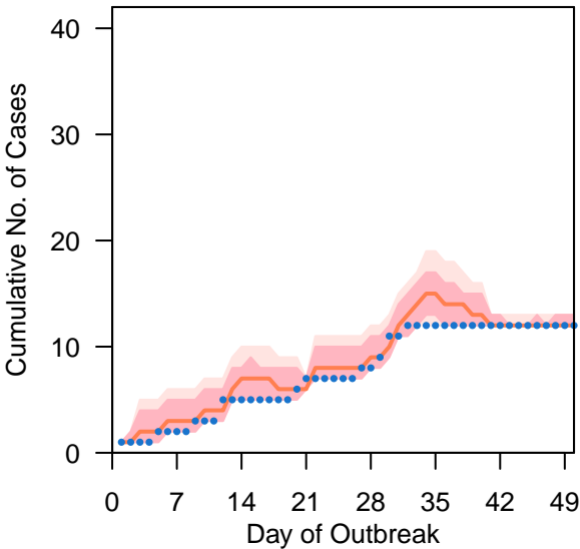

# Outbreak 4200

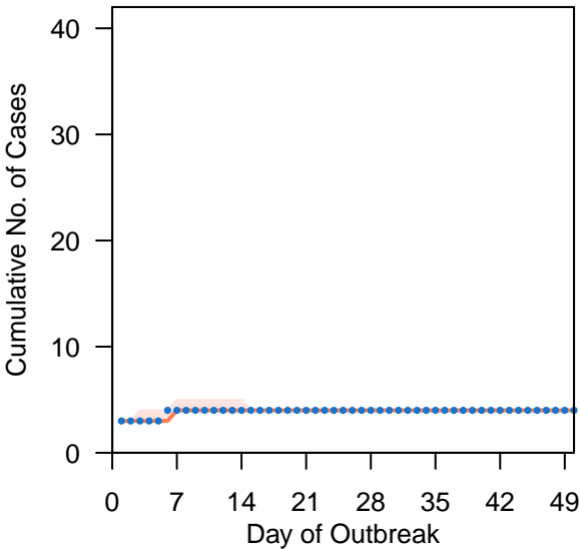

# Outbreak 4300

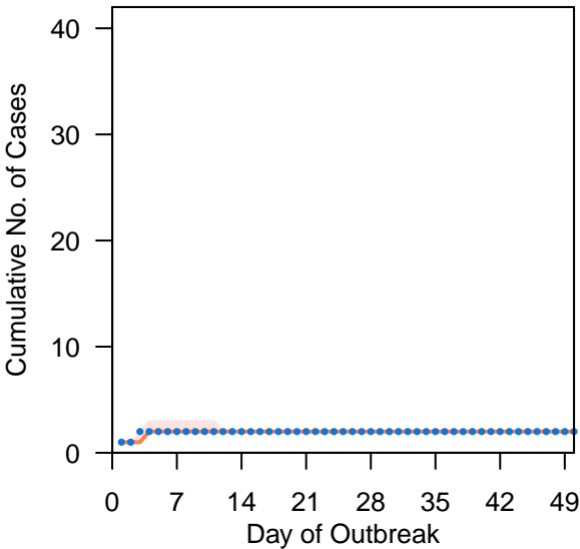

# Outbreak 4400

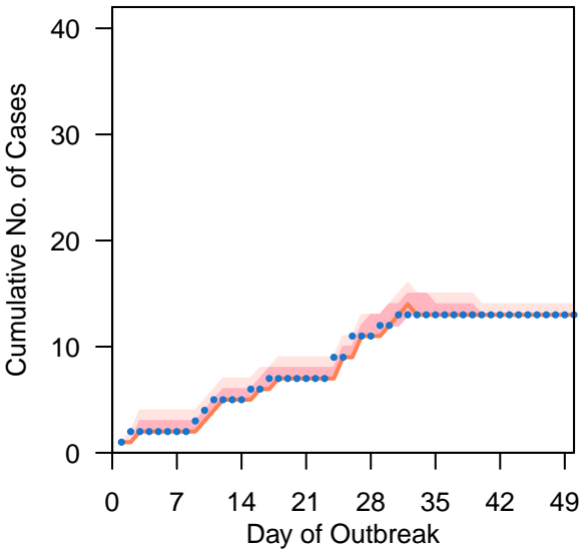

# Outbreak 4500

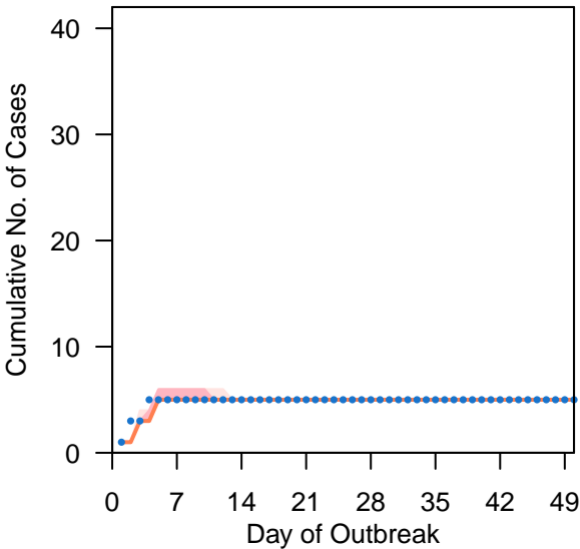

# Outbreak 4600



# Outbreak 4700

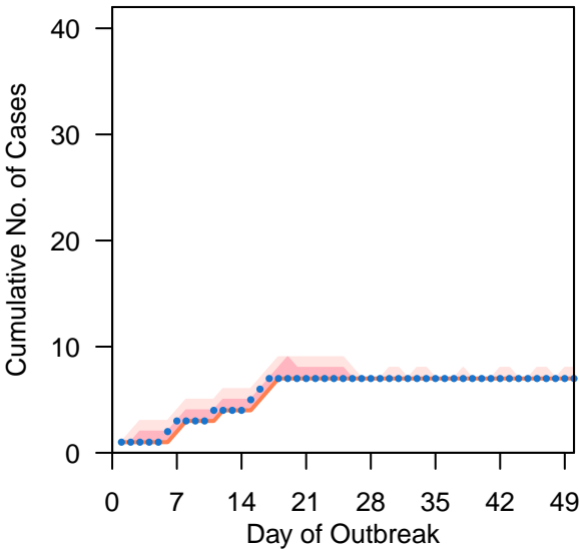

# Outbreak 4800





# Outbreak 4900

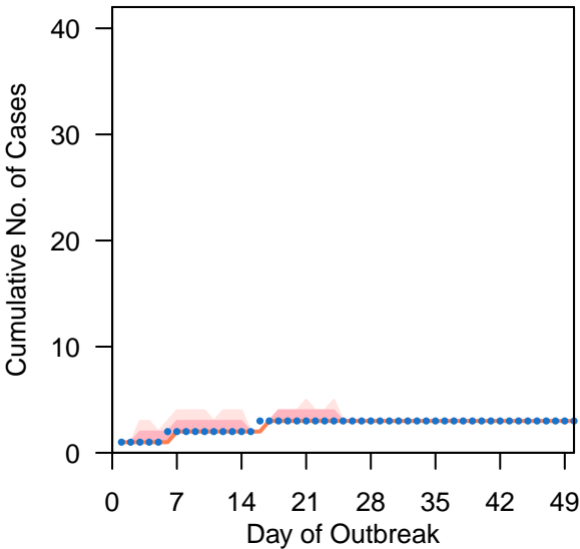

Outbreak 5000

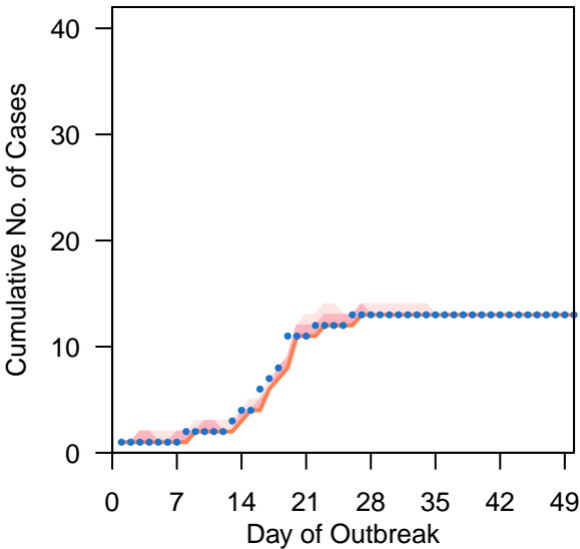

# Outbreak 5100

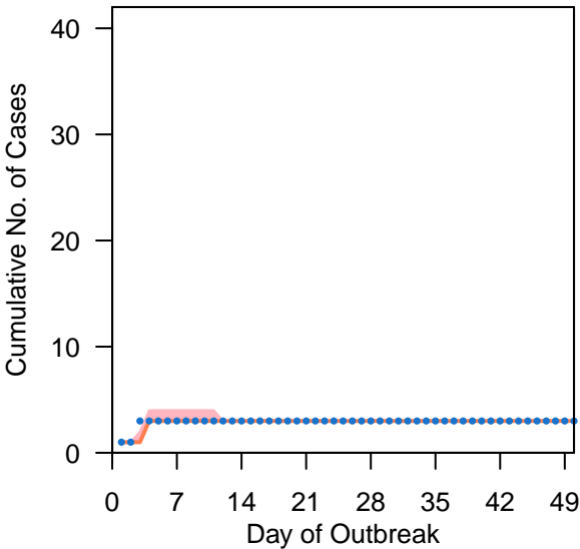

# Outbreak 5200

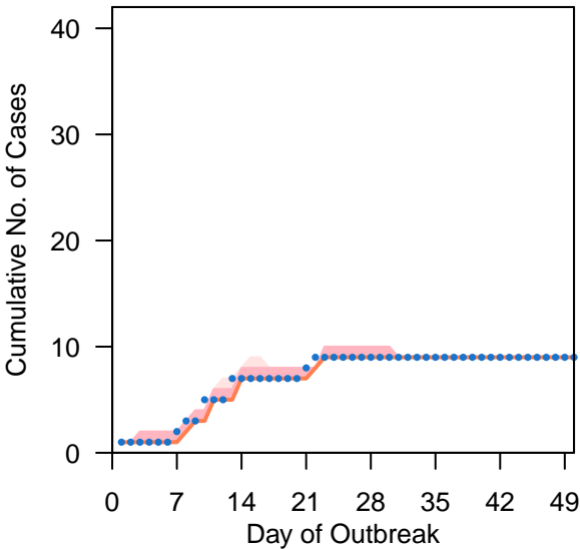

# Outbreak 5300

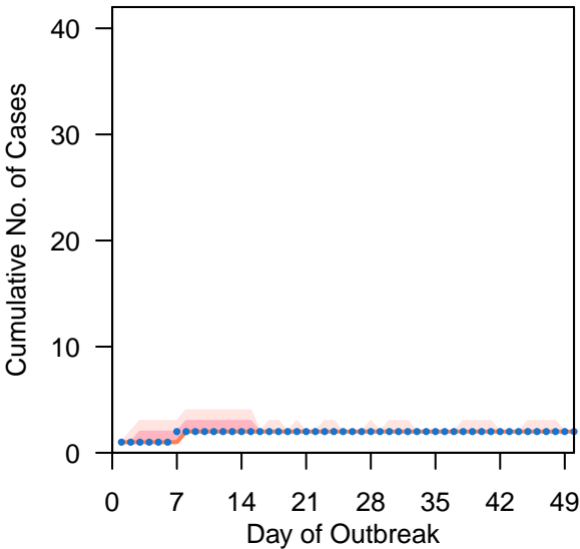

# Outbreak 5400

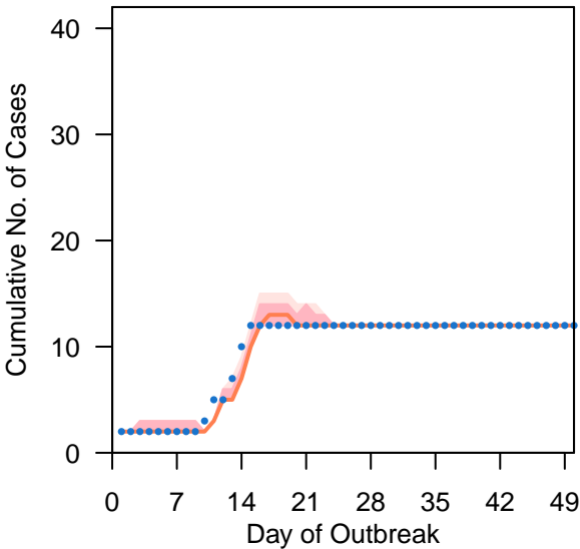

# Outbreak 5500

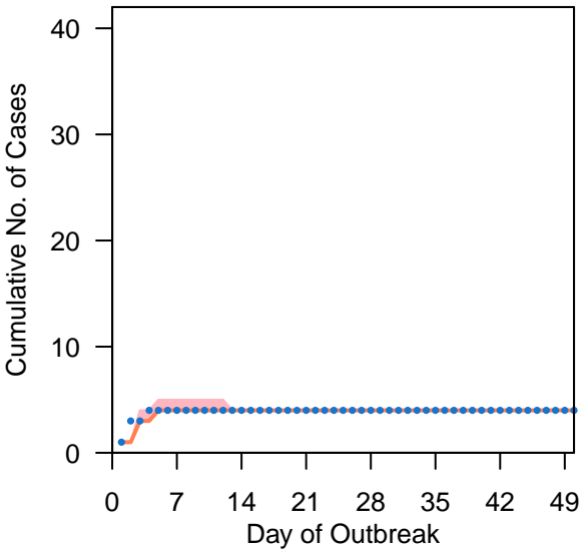

# Outbreak 5600





# Outbreak 5700



# Outbreak 5800

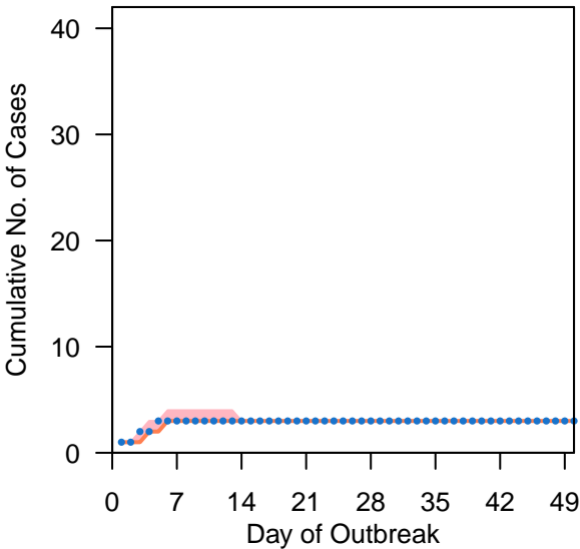

# Outbreak 5900

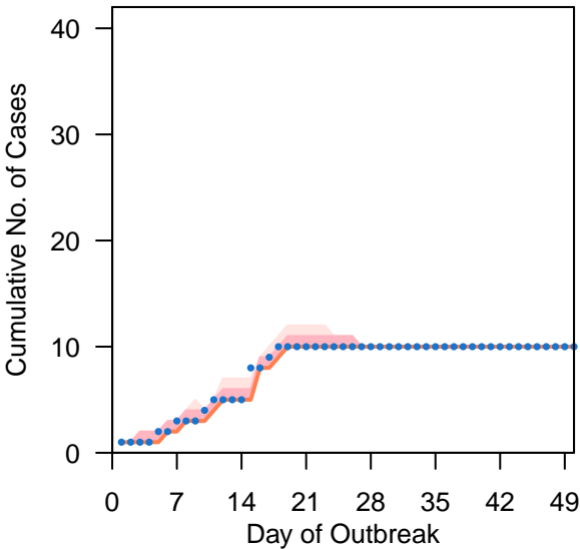

# Outbreak 6000

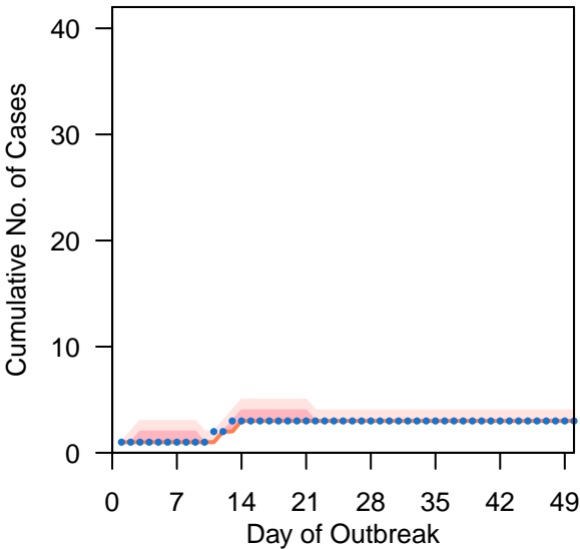

# Outbreak 6100

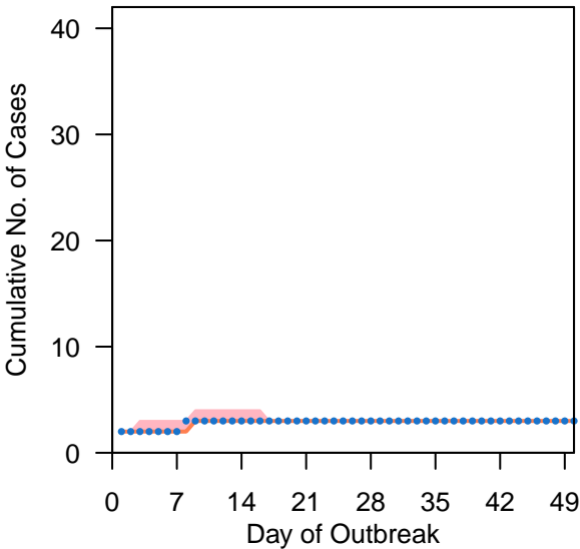

# Outbreak 6200



# Outbreak 6300

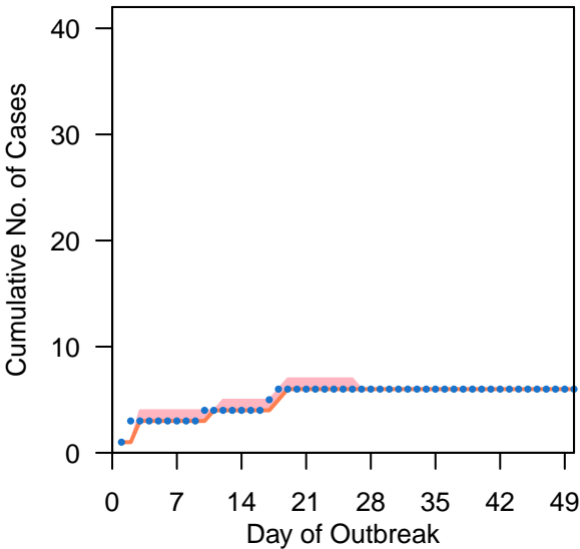

# Outbreak 6400

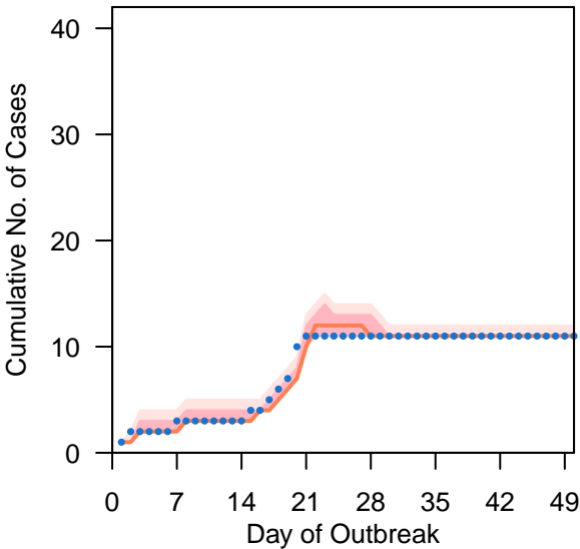



# Outbreak 6500

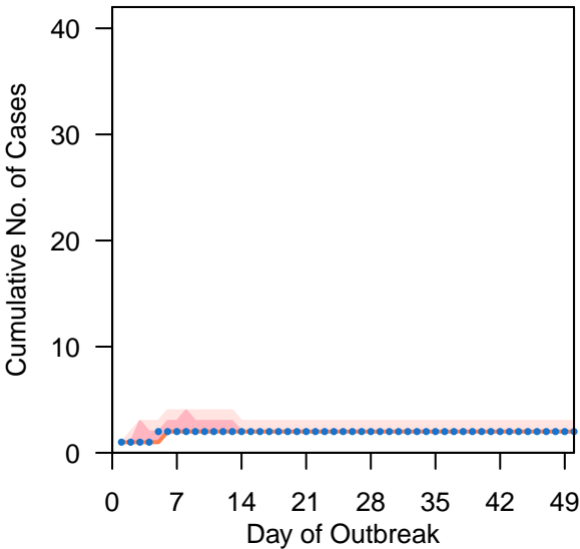

# Outbreak 6600

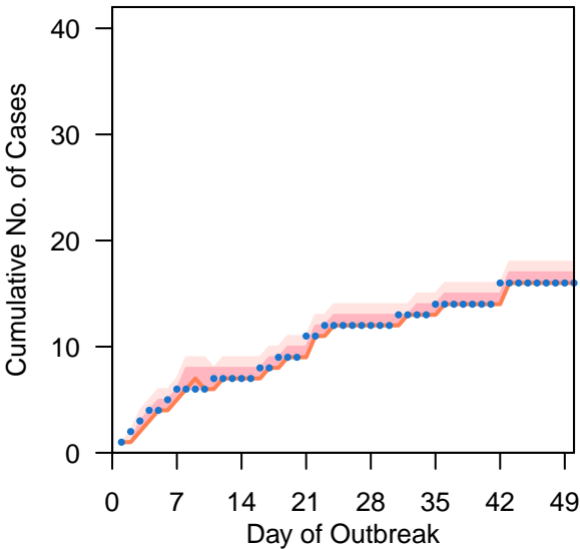

# Outbreak 6700

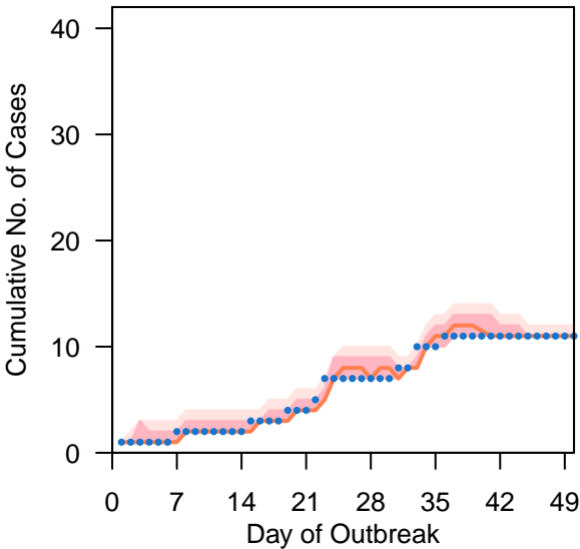

# Outbreak 6800

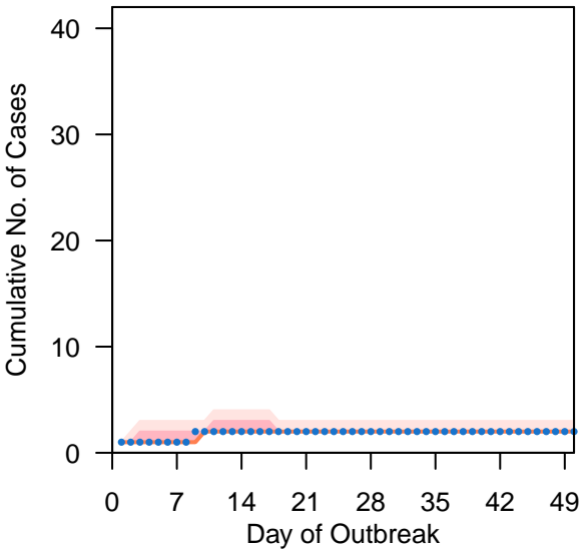

# Outbreak 6900

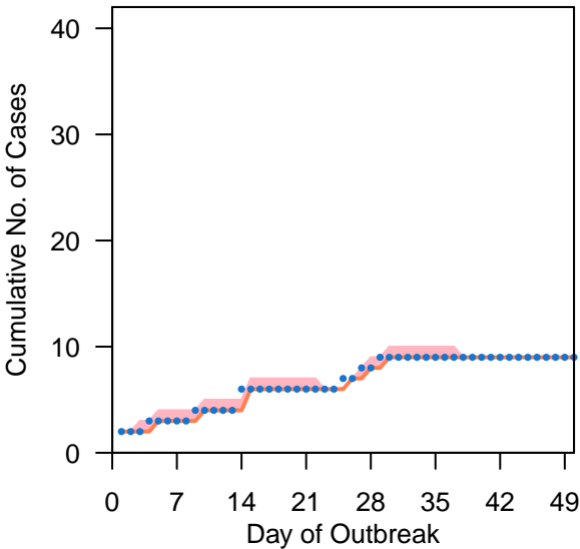

# Outbreak 7000

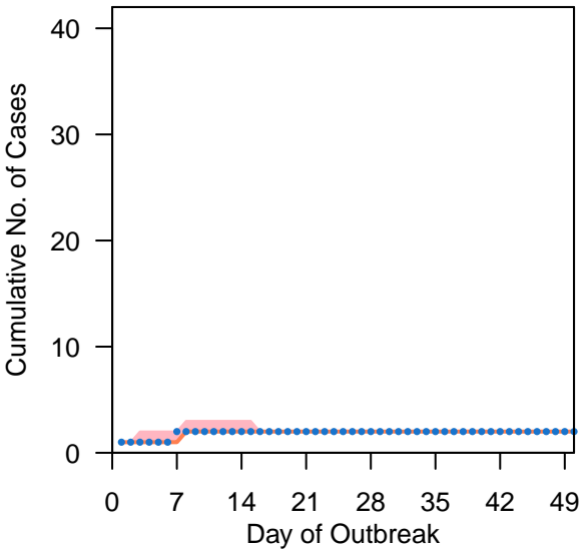

# Outbreak 7100

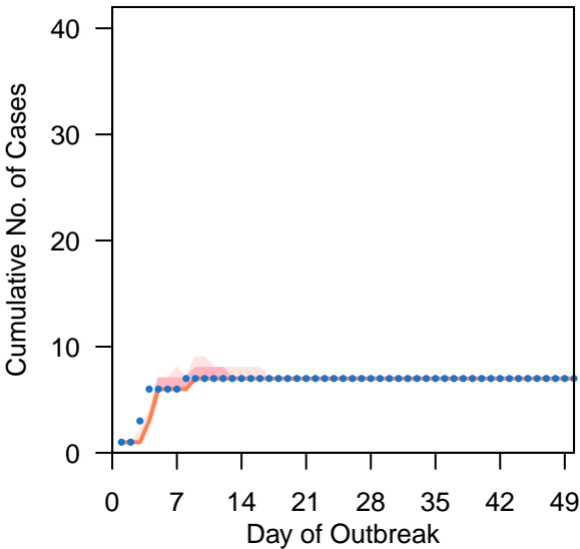

# Outbreak 7200

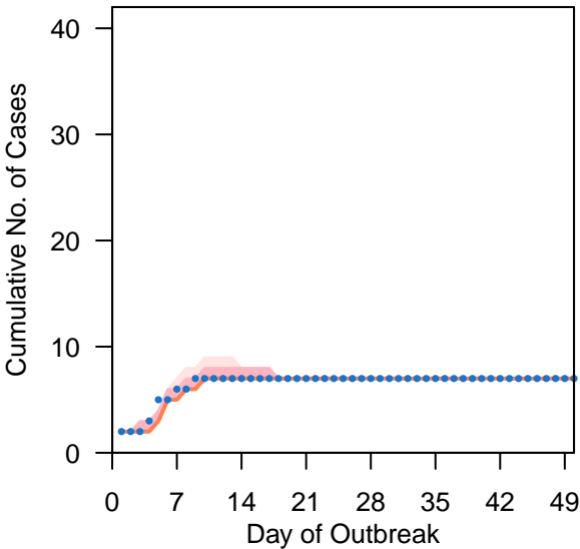



# Outbreak 7300



# Outbreak 7400



# Outbreak 7500

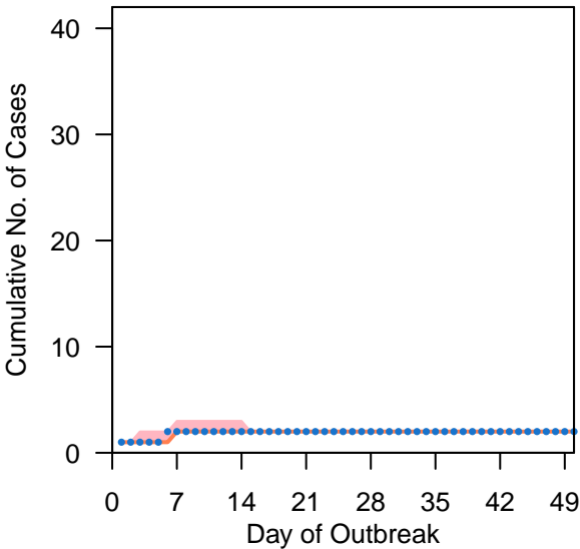

# Outbreak 7600

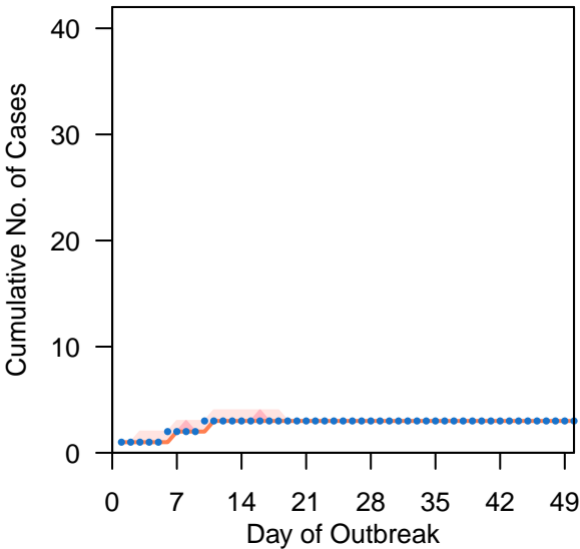

# Outbreak 7700

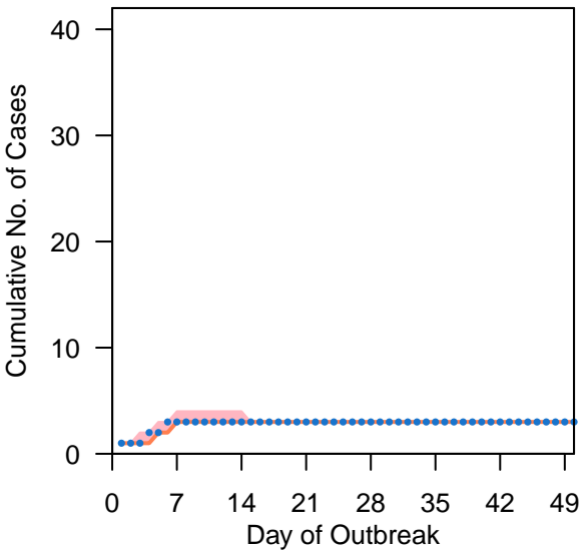

# Outbreak 7800

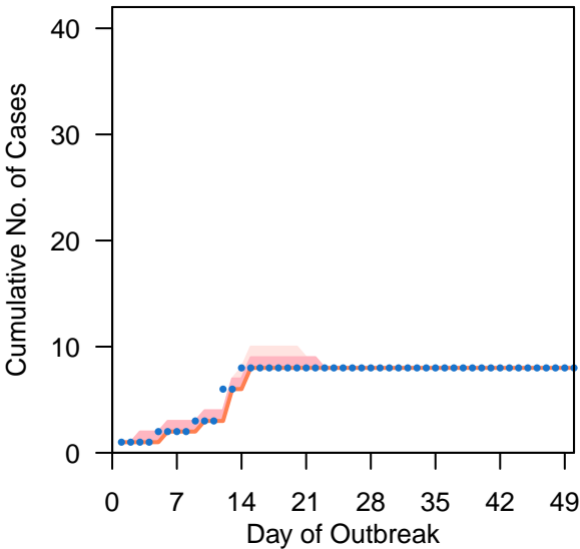

# Outbreak 7900

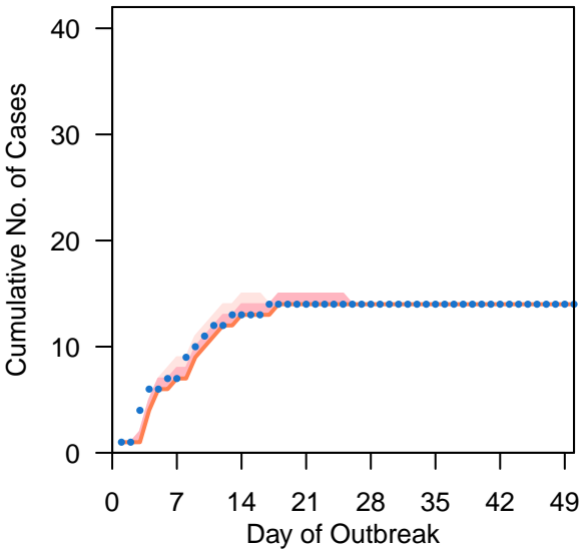

# Outbreak 8000

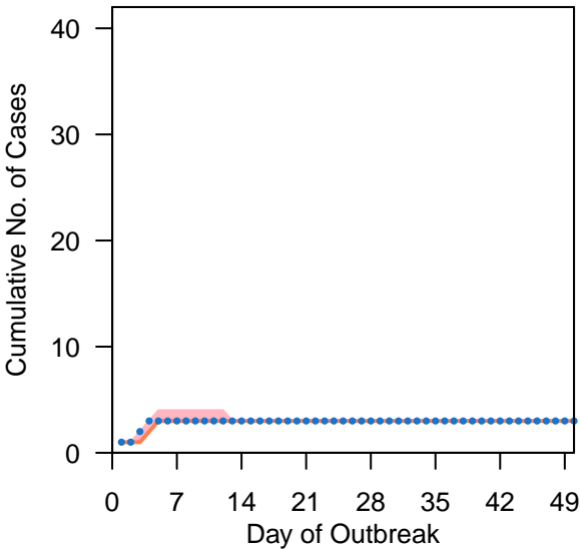



# Outbreak 8100

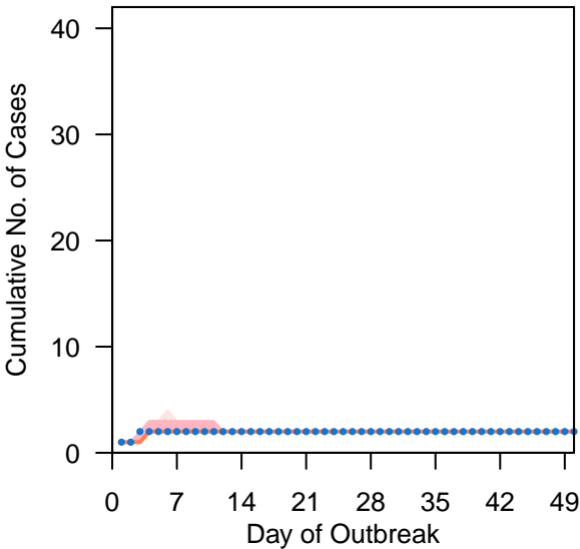

# Outbreak 8200

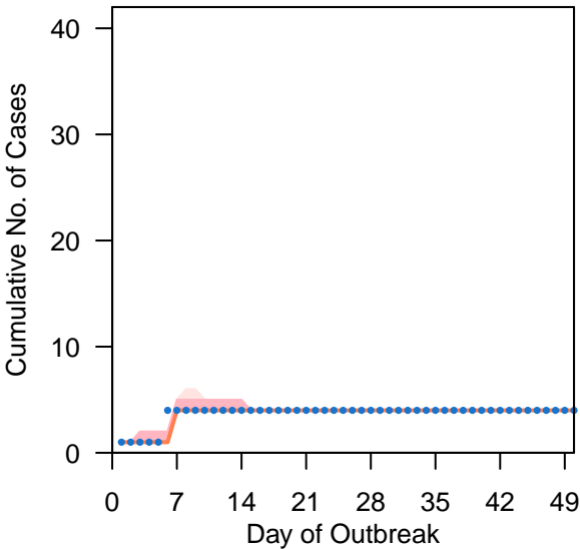

# Outbreak 8300

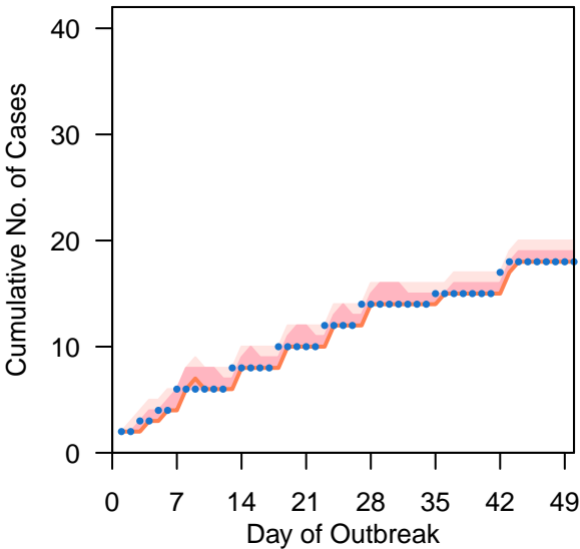

# Outbreak 8400

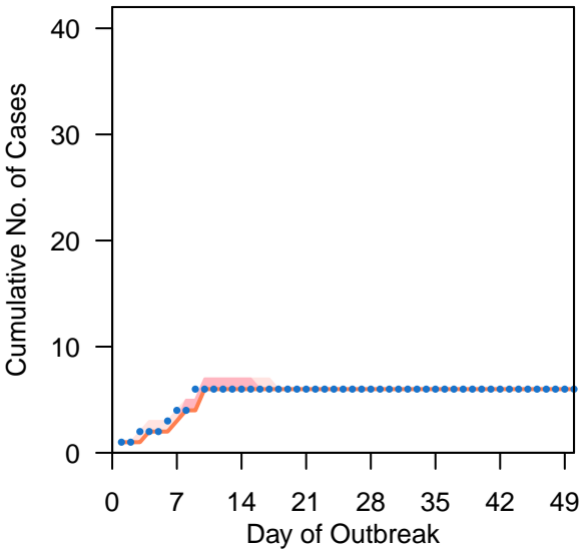

# Outbreak 8500

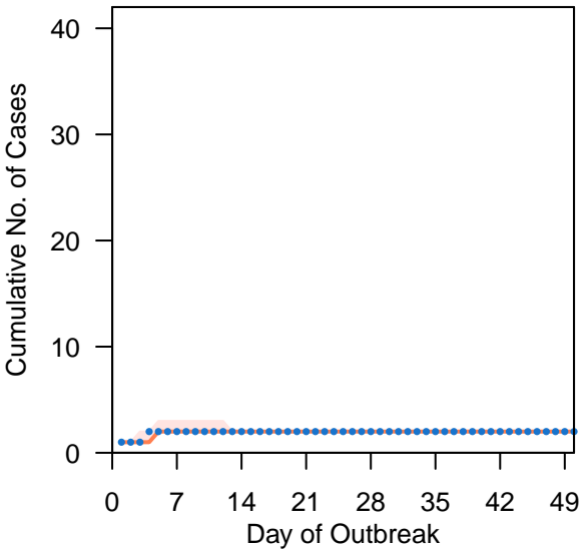

# Outbreak 8600

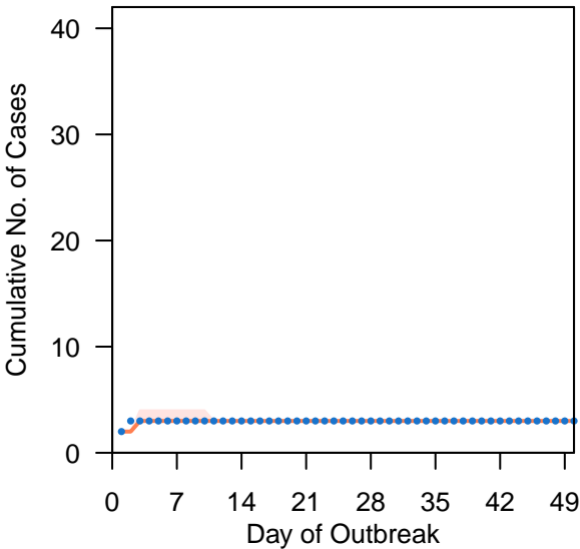

# Outbreak 8700

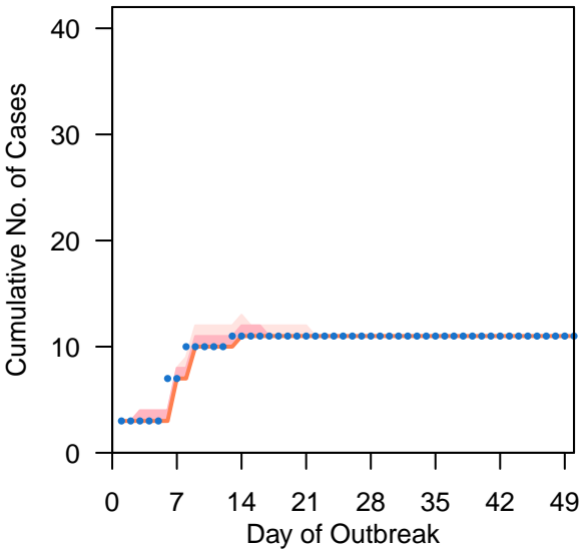

# Outbreak 8800

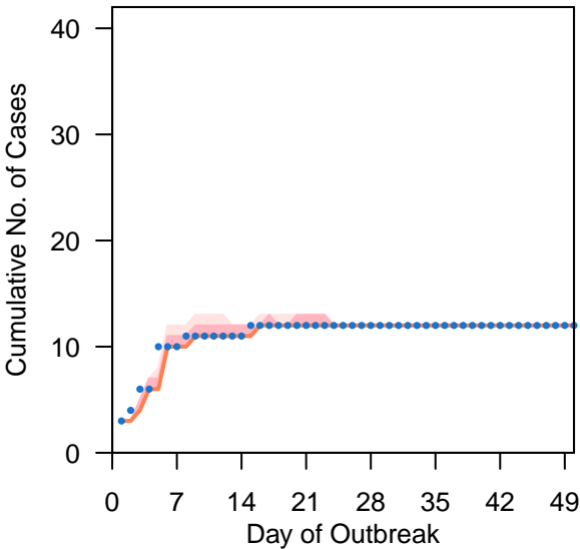



# Outbreak 8900

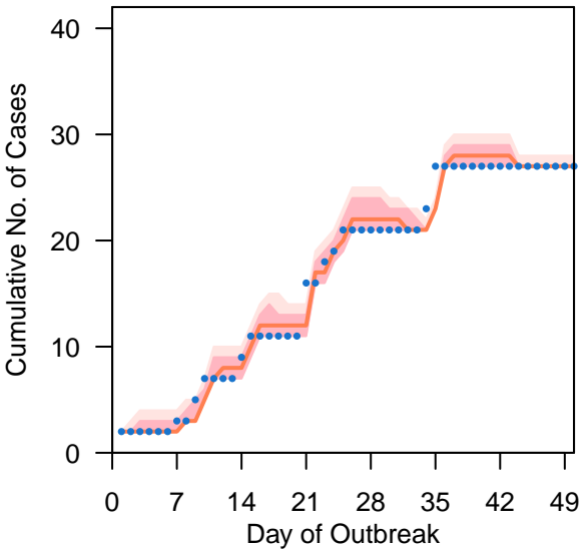

# Outbreak 9000

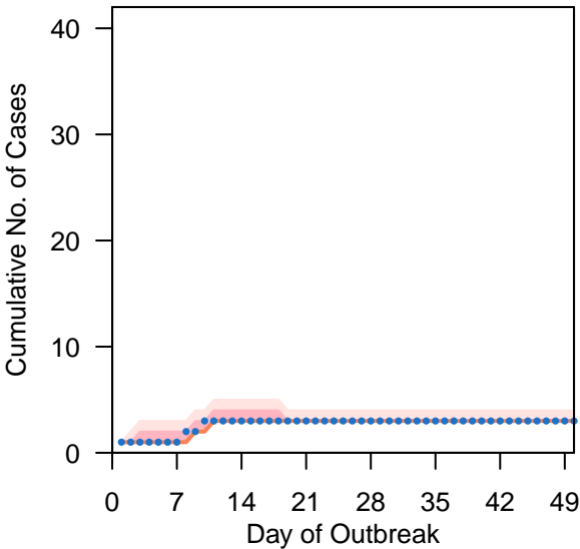

# Outbreak 9100

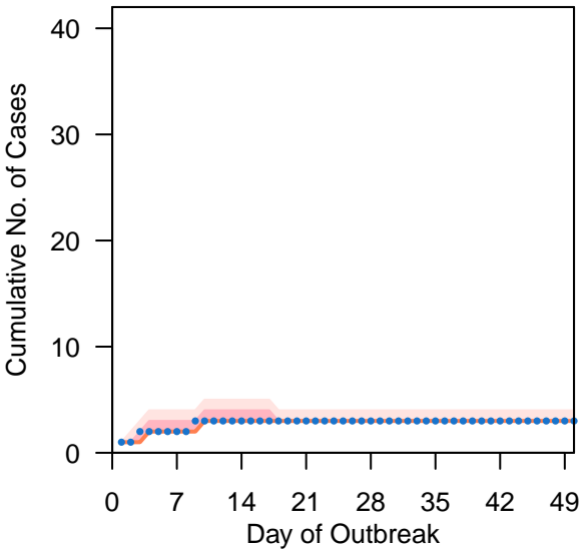

# Outbreak 9200

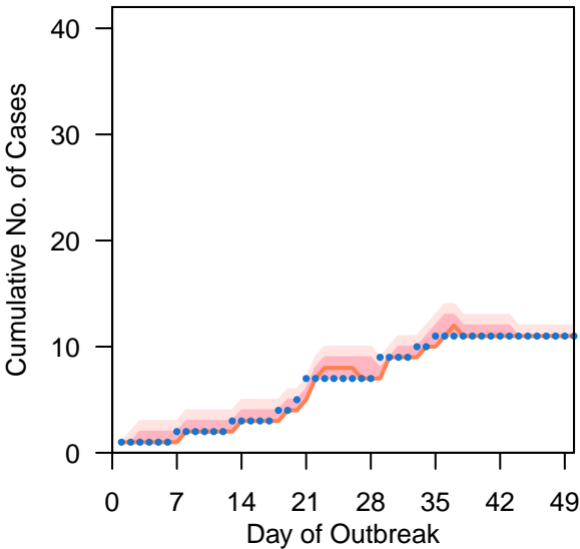

# Outbreak 9300

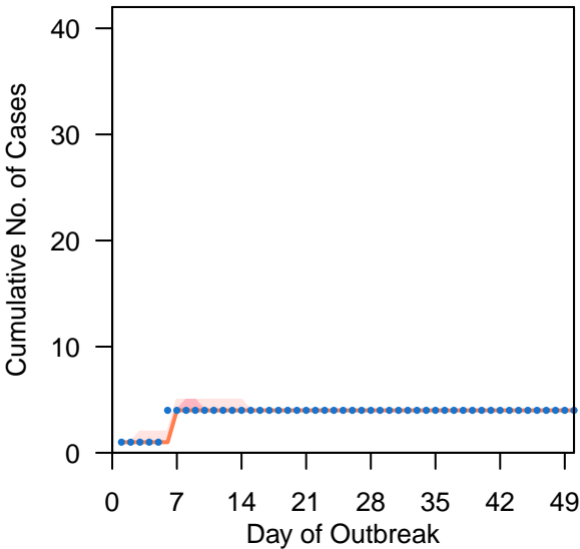

# Outbreak 9400

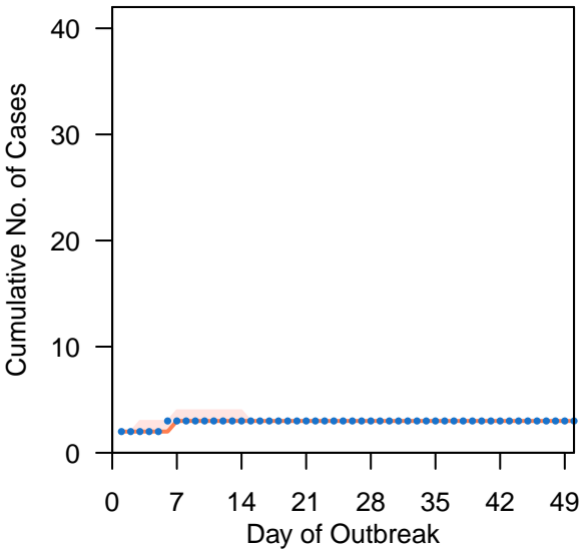

# Outbreak 9500

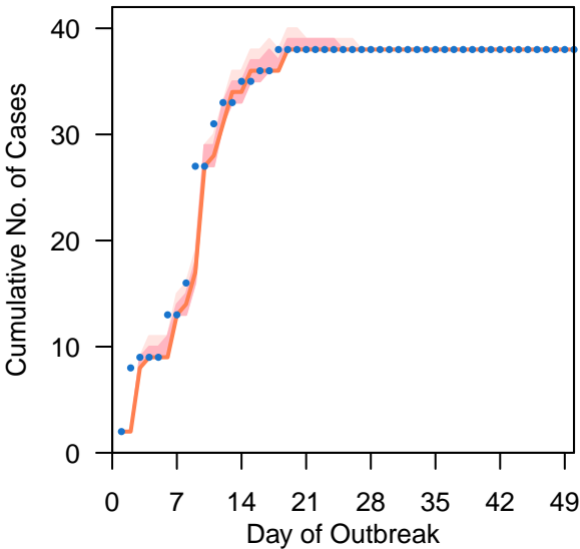

# Outbreak 9600

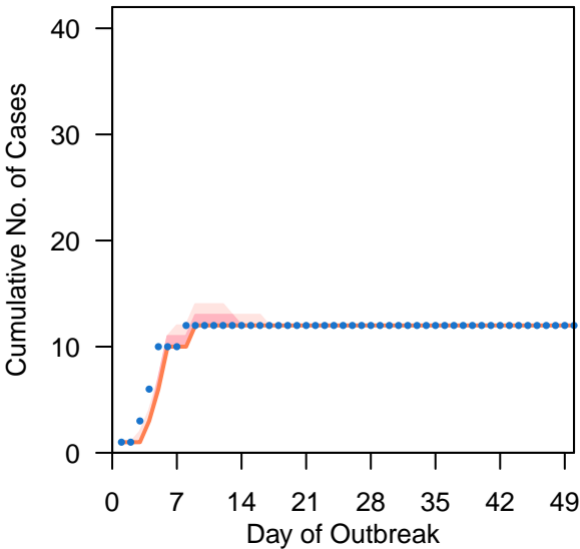



# Outbreak 9700

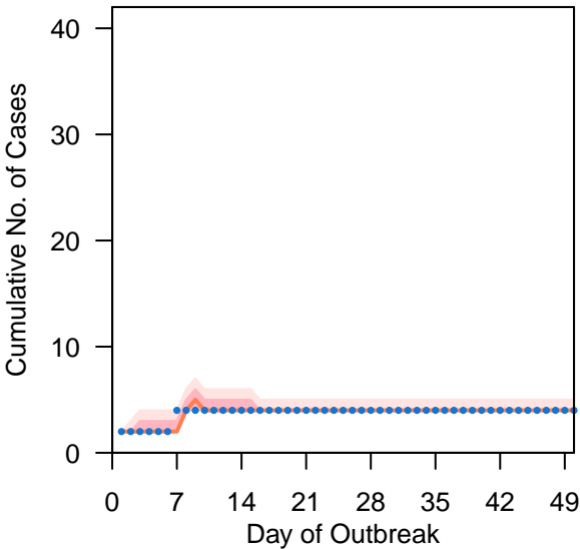

# Outbreak 9800

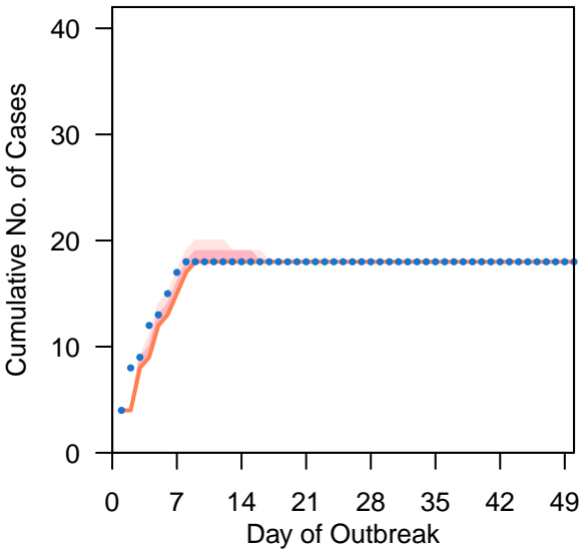

# Outbreak 9900

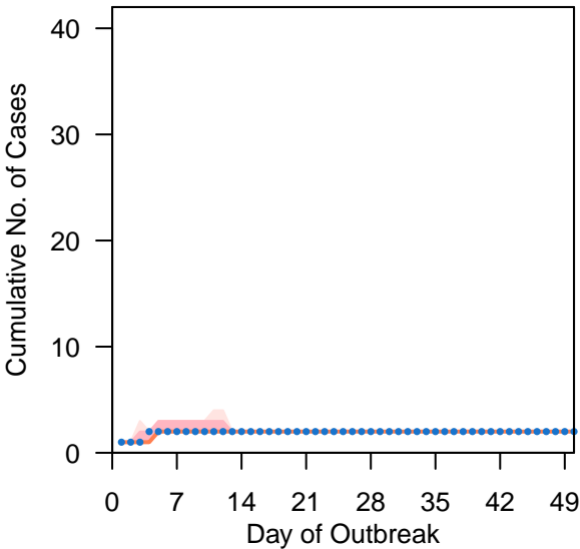

Supplement: tpmd180099.SD2.pdf [file tpmd180099.SD2.pdf]
