# Supplementary material for: The Effect of School Closure on Hand, Foot, and Mouth Disease Transmission in Singapore: A Modeling Approach
Source: PubMed Central journal article supplement (PMC6283473; doi:10.4269/ajtmh.18-0099), 2018-10-22

# Closure 1

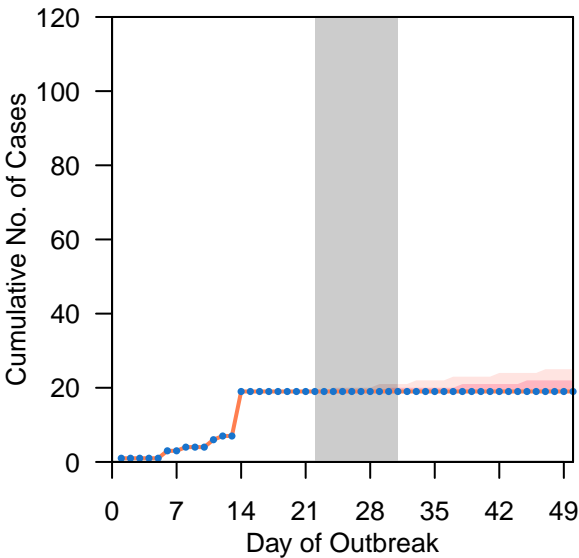

## Closure 2

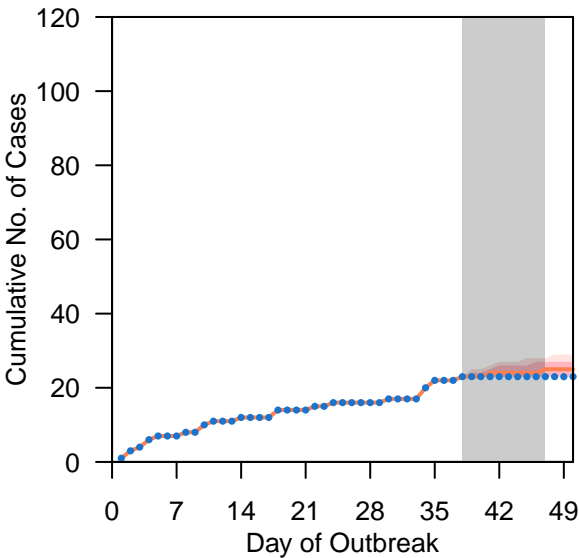

### Closure 3

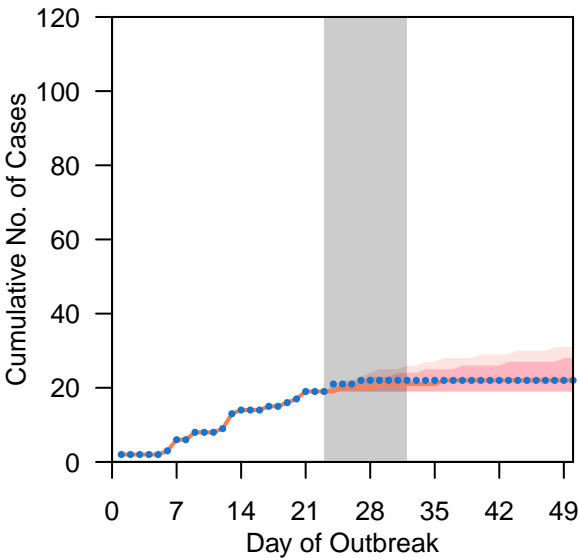

# Closure 4

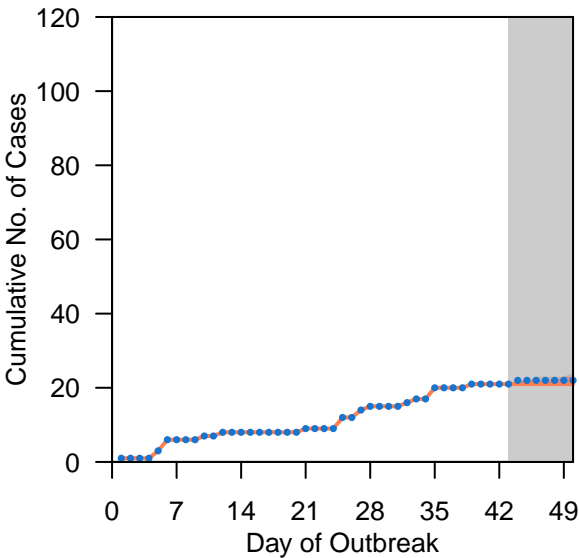

# Closure 5

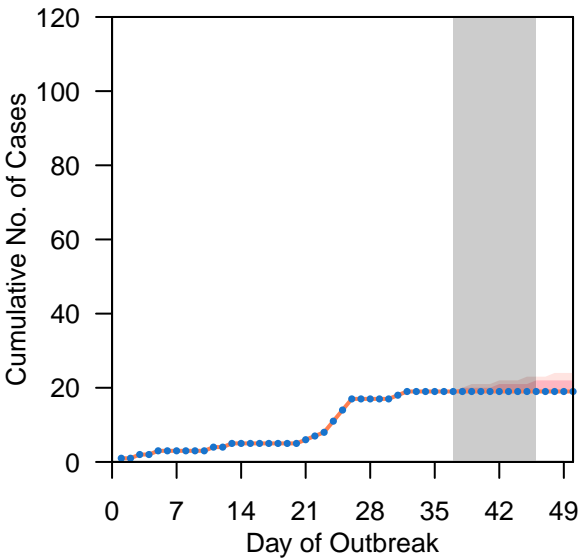

## Closure 6

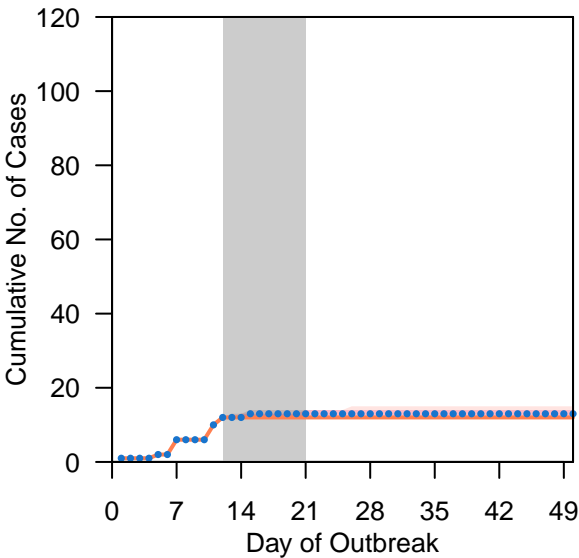

# Closure 7

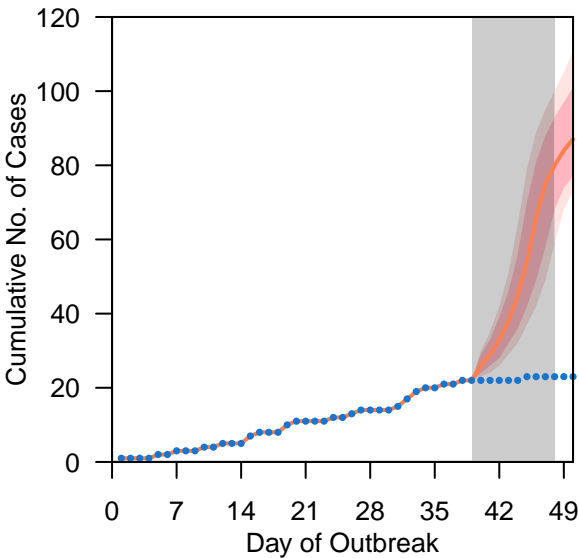

## Closure 8

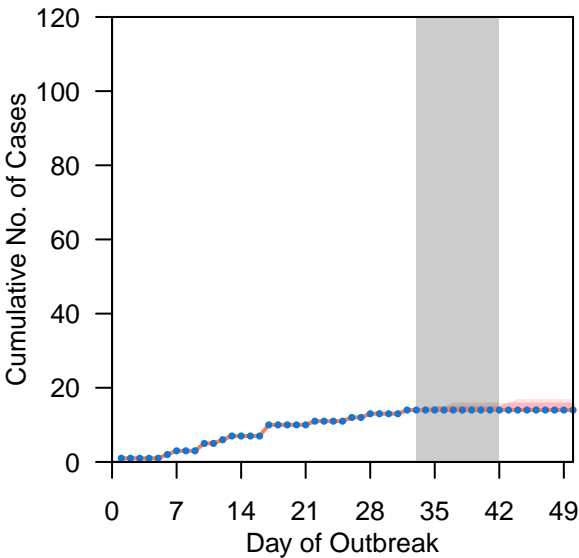



# Closure 9

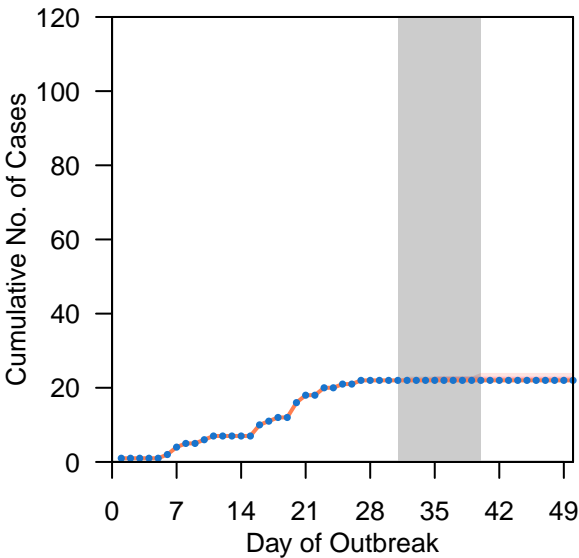

# Closure 10

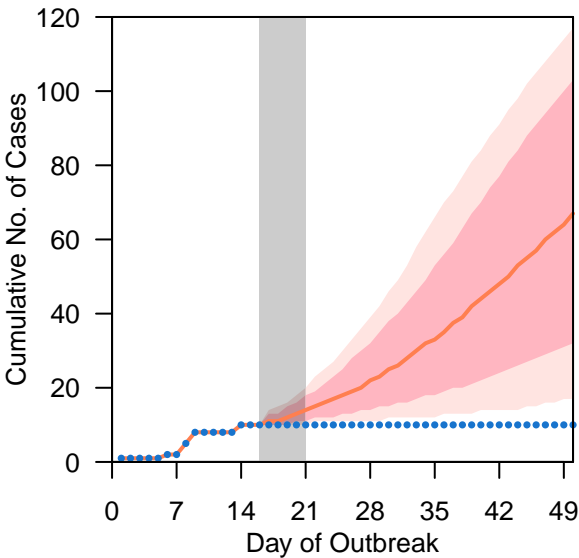

# Closure 11

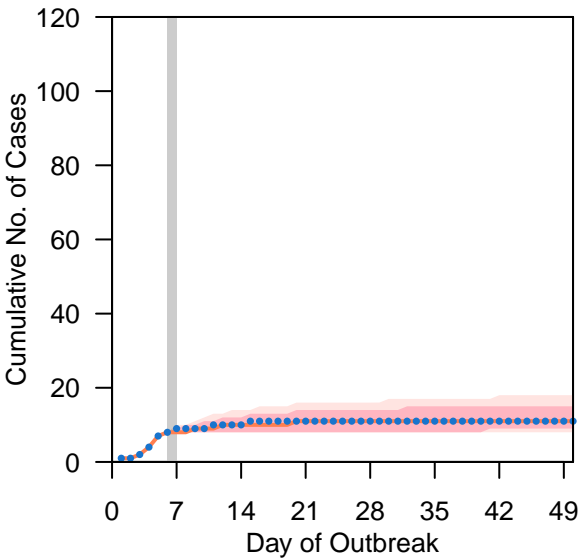

# Closure 12

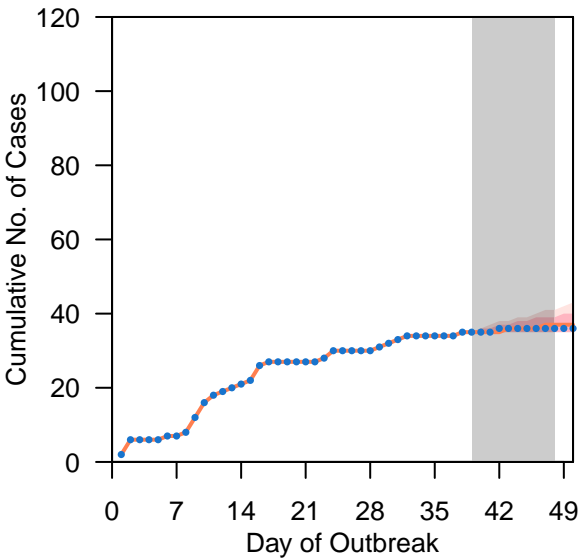

# Closure 13

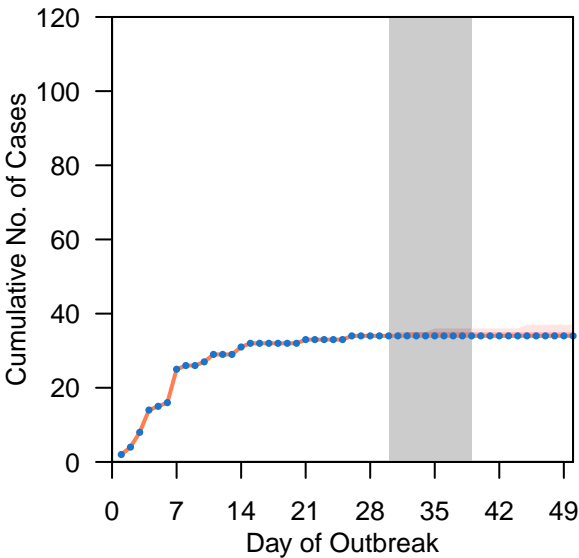

# Closure 14

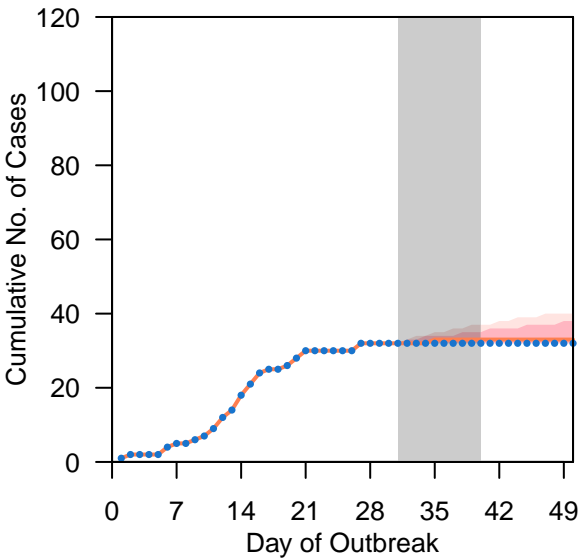

# Closure 15

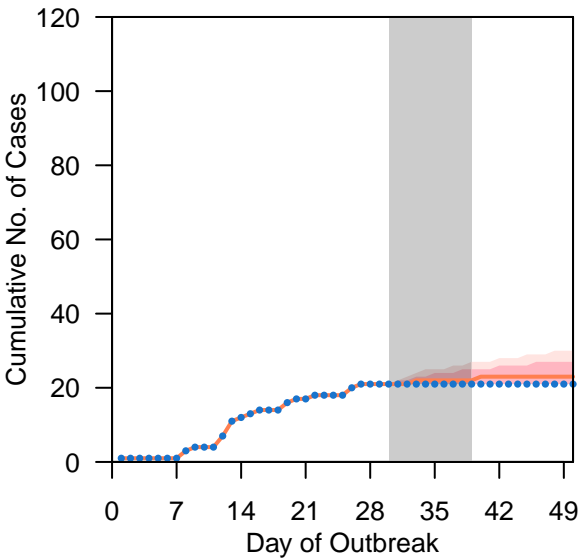

# Closure 16

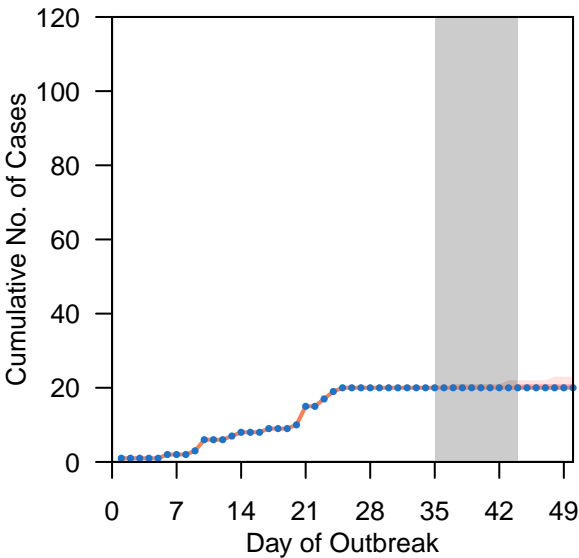



# Closure 17

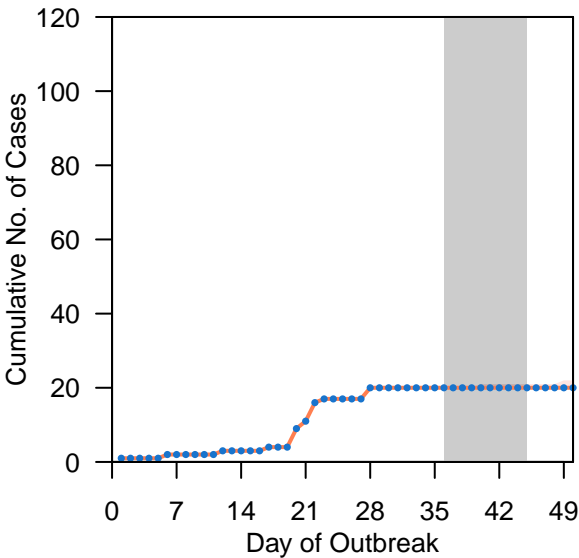

# Closure 18

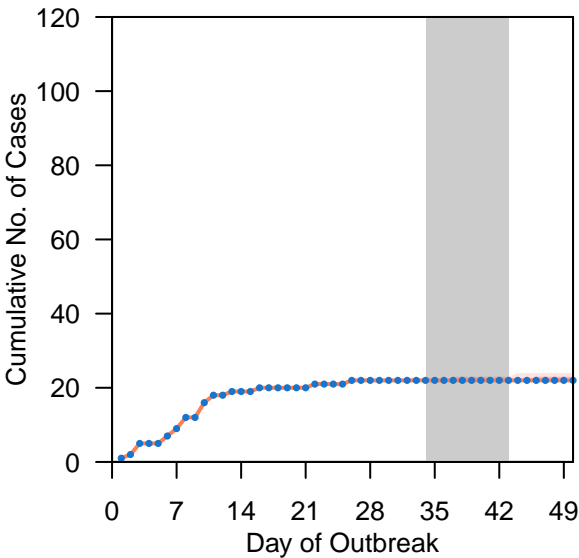

# Closure 19

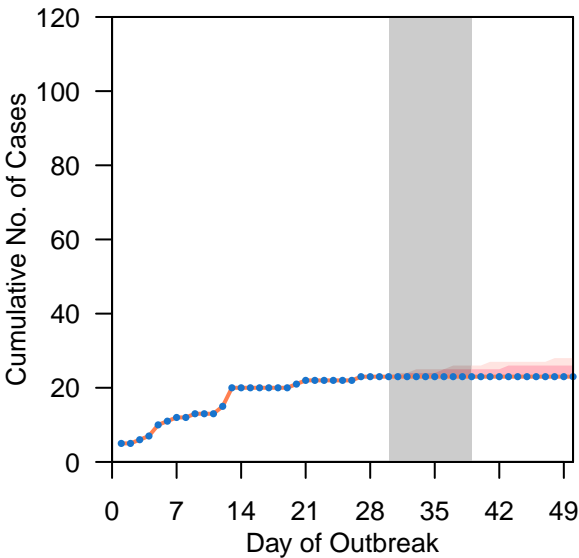

## Closure 20

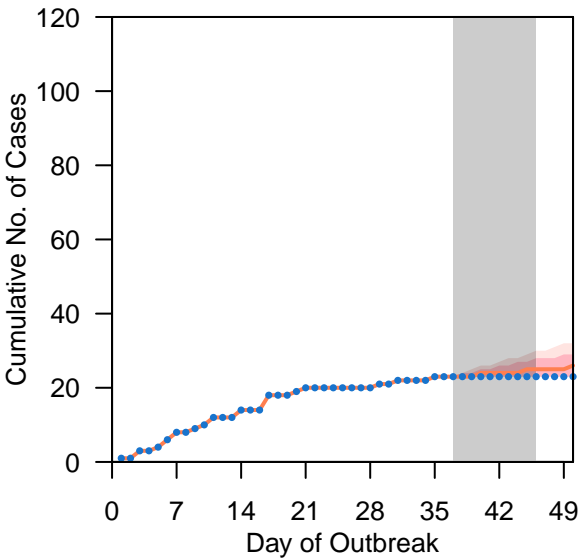

# Closure 21

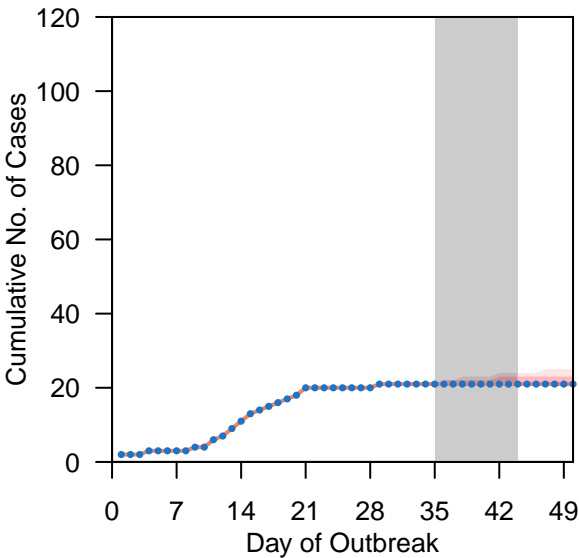

## Closure 22

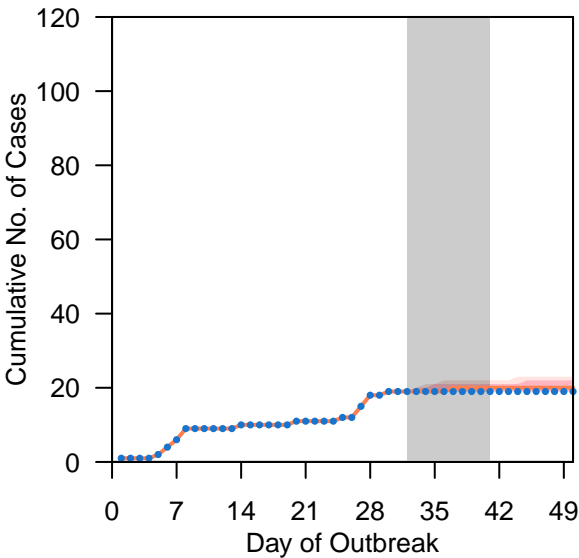

# Closure 23

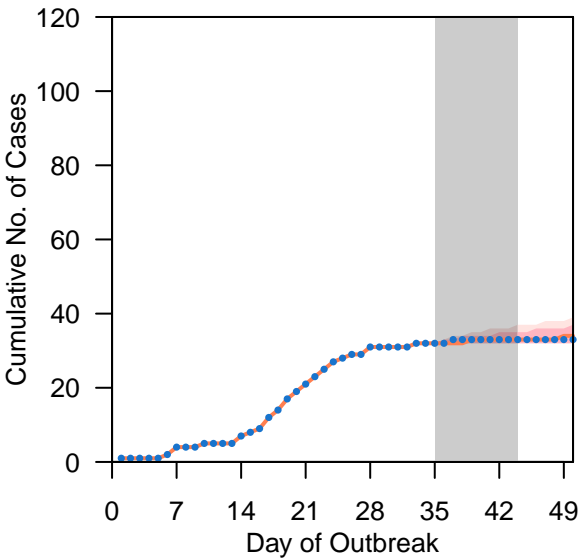

# Closure 24

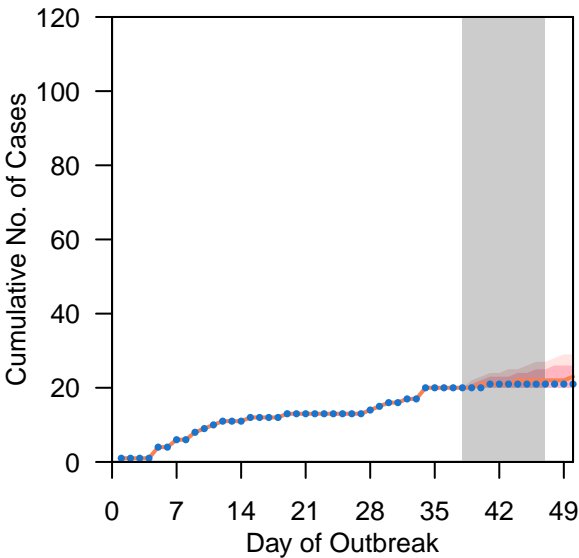



# Closure 25

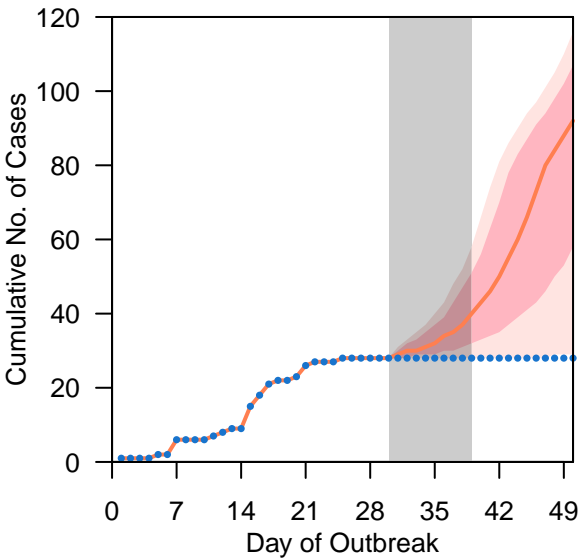

# Closure 26

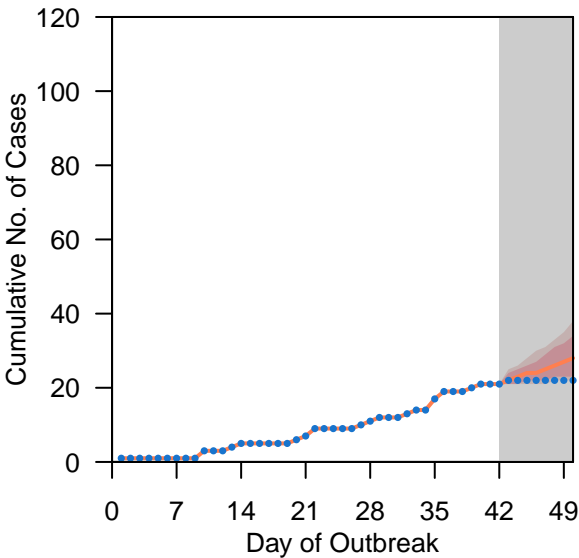

## Closure 27

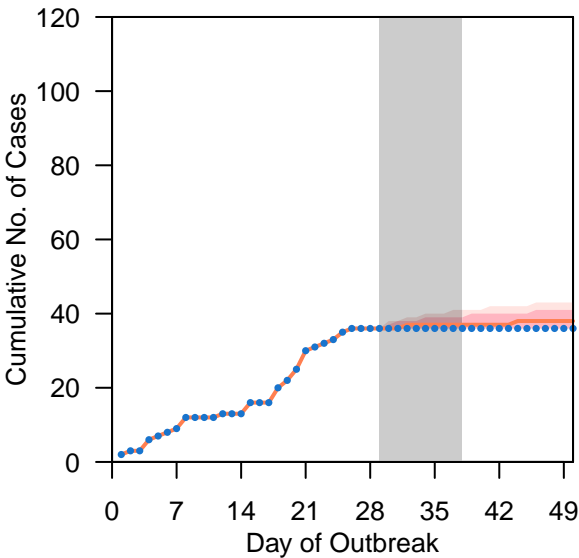

# Closure 28

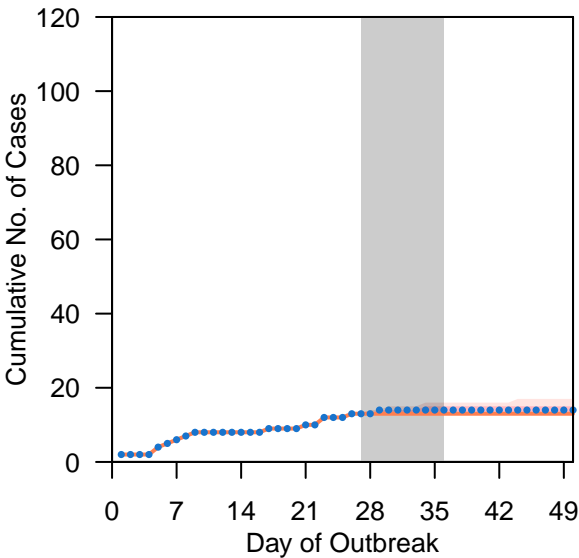

# Closure 29

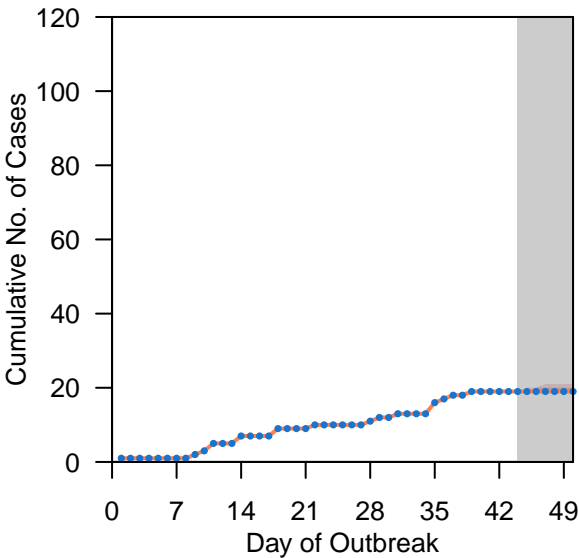

# Closure 30

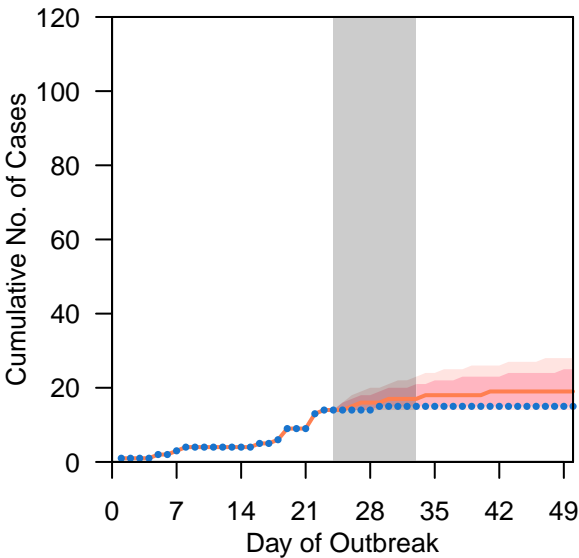

# Closure 31

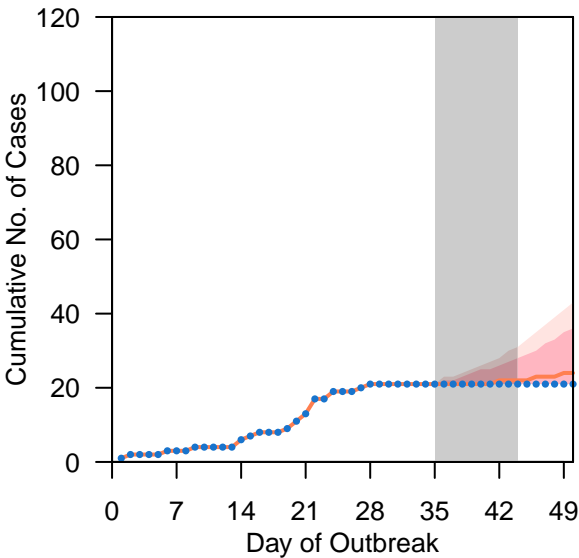

# Closure 32

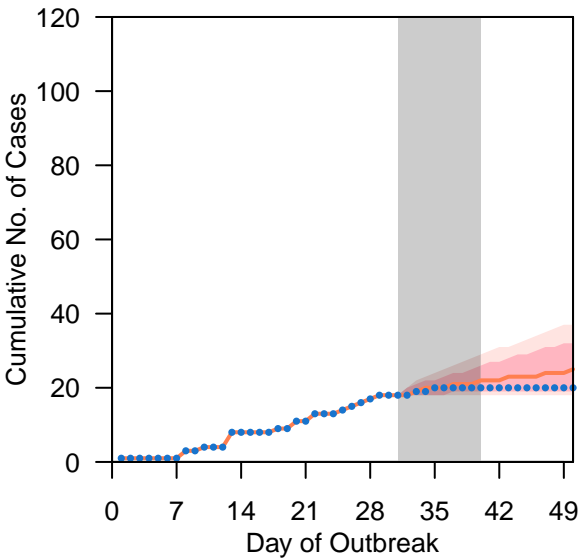



# Closure 33

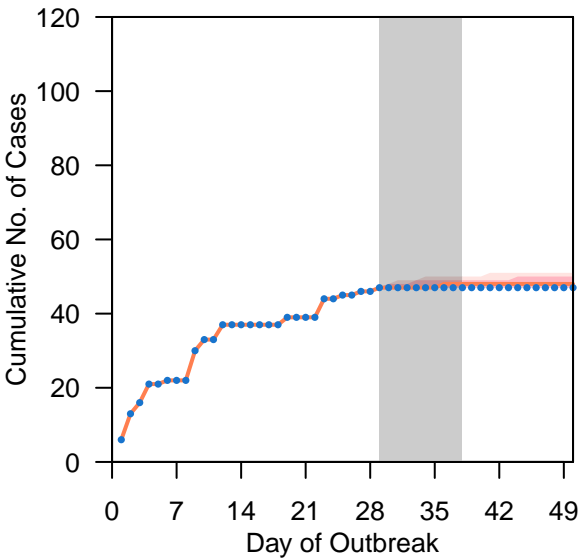

# Closure 34

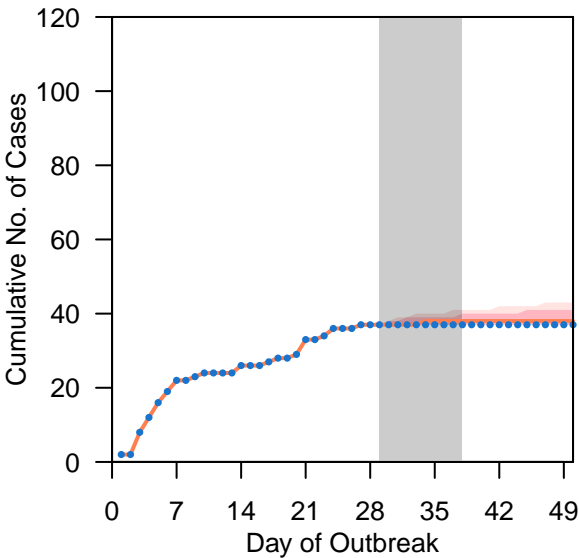

# Closure 35

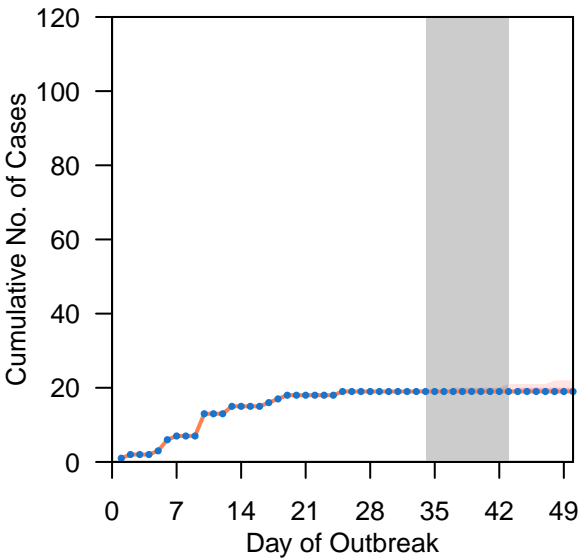

# Closure 36

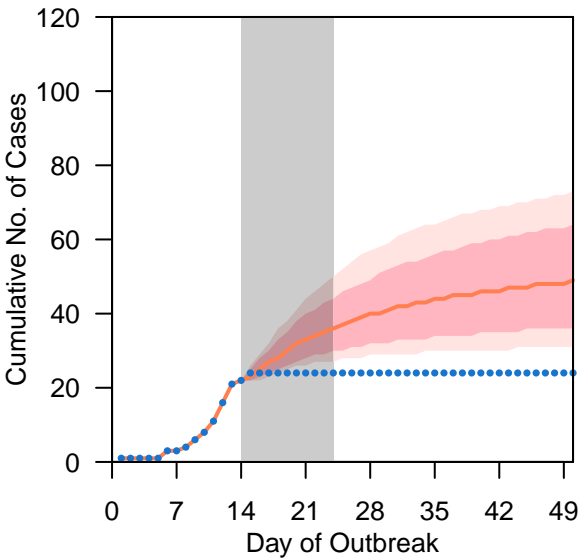

# Closure 37

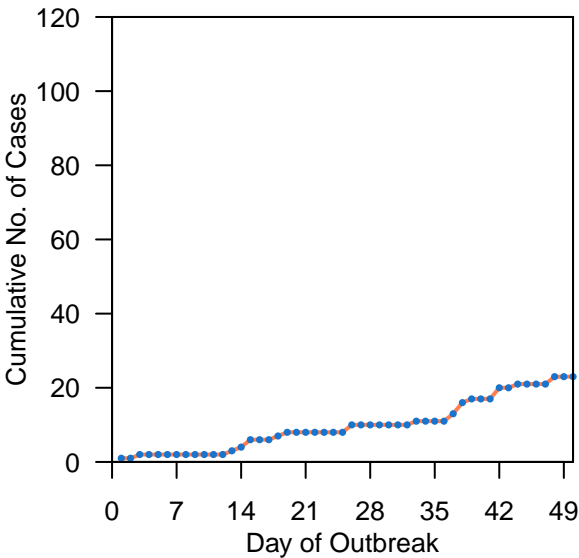

# Closure 38

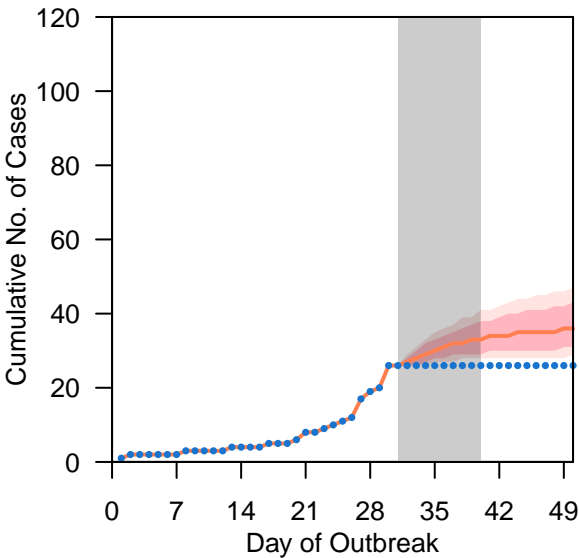

# Closure 39

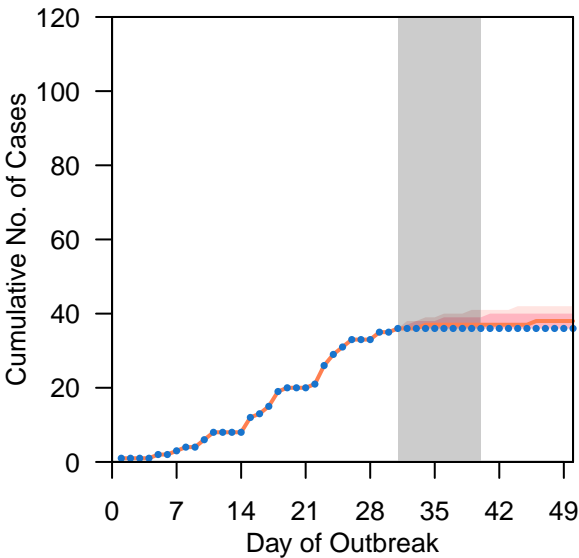

# Closure 40

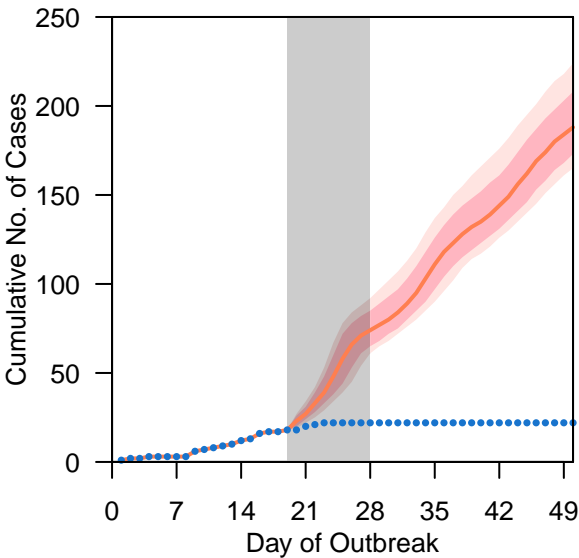



# Closure 41

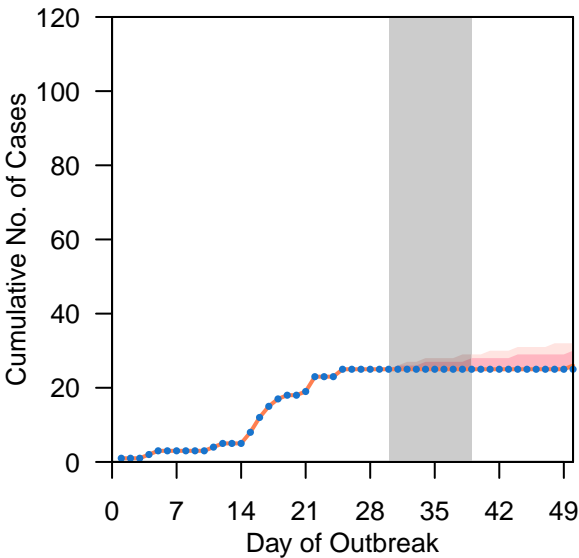

# Closure 42

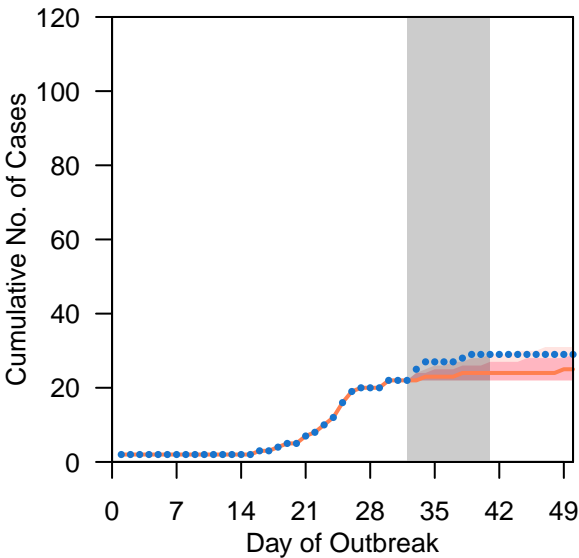

# Closure 43

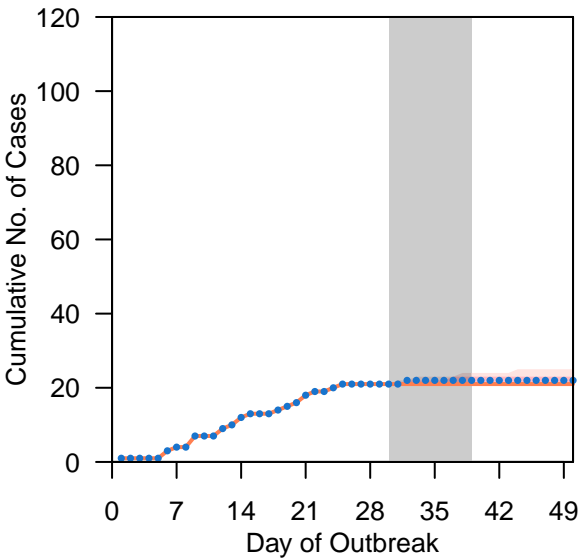

# Closure 44

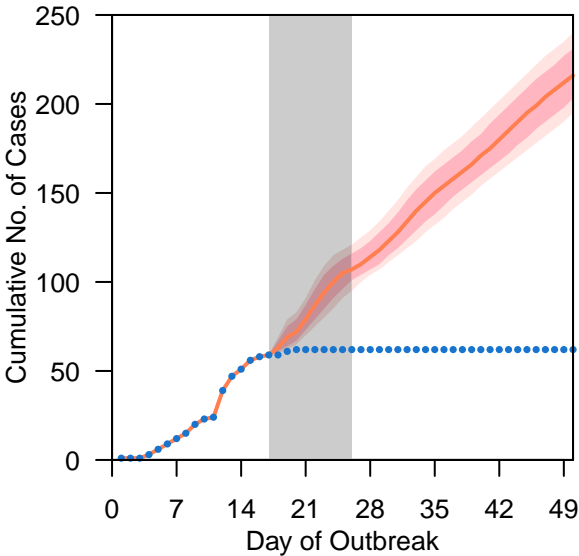

# Closure 45

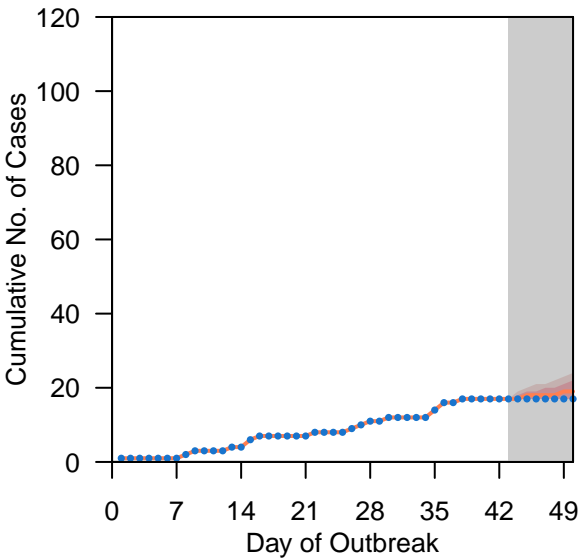

# Closure 46

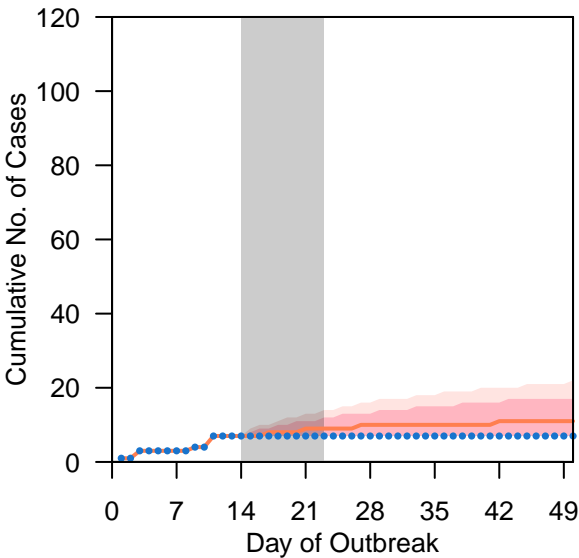

# Closure 47

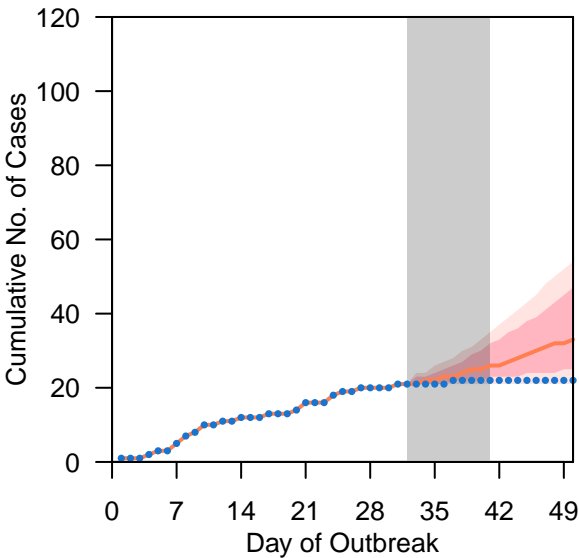

# Closure 48

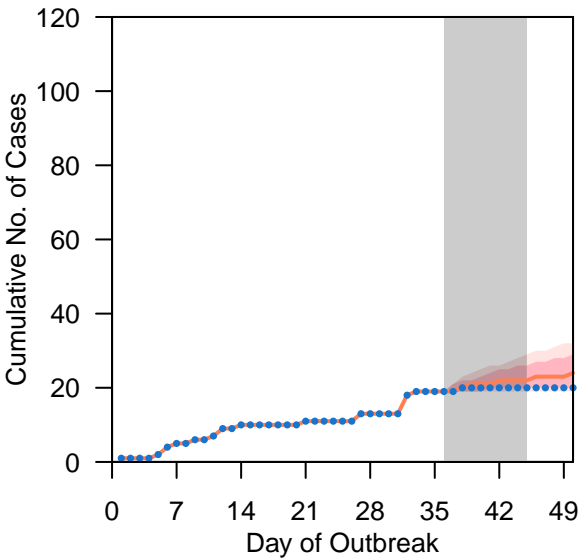



# Closure 49

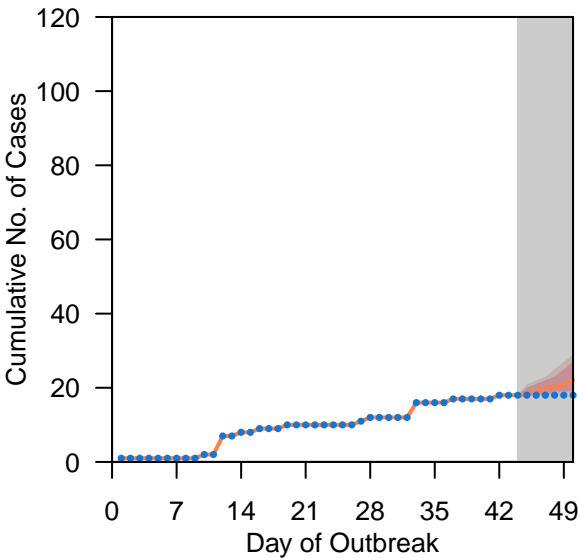

# Closure 50

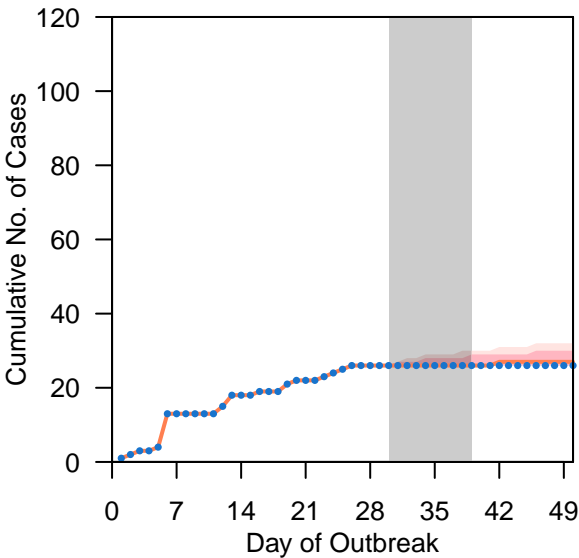

# Closure 51

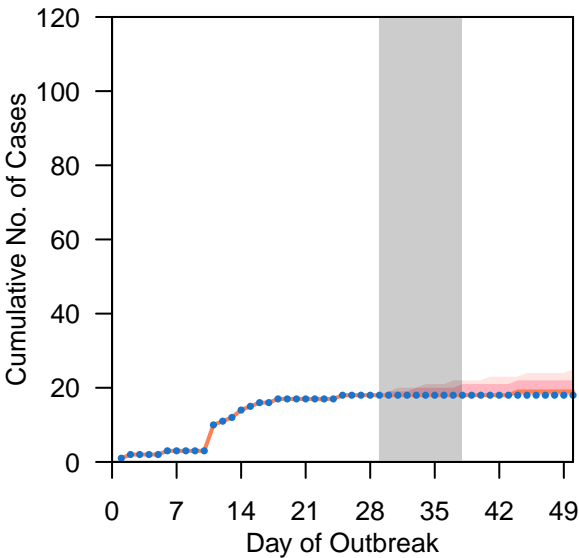

# Closure 52

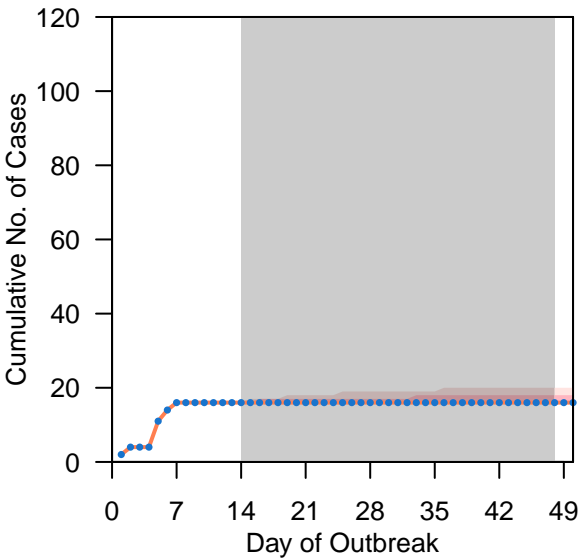

# Closure 53

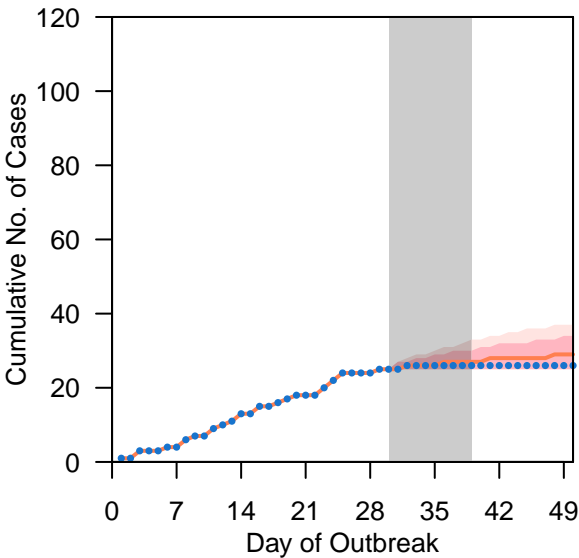

# Closure 54

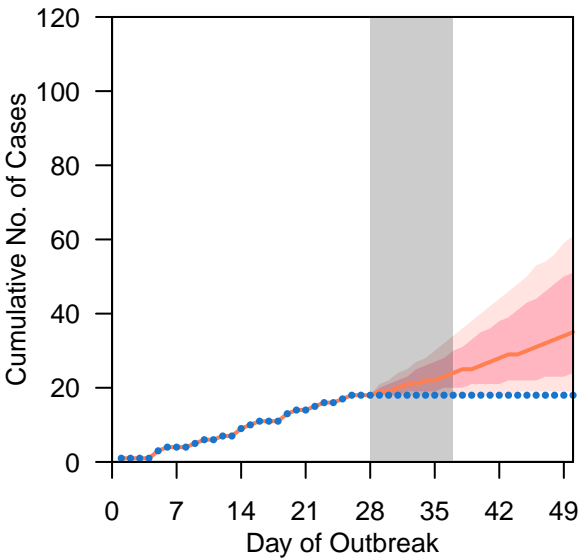

# Closure 55

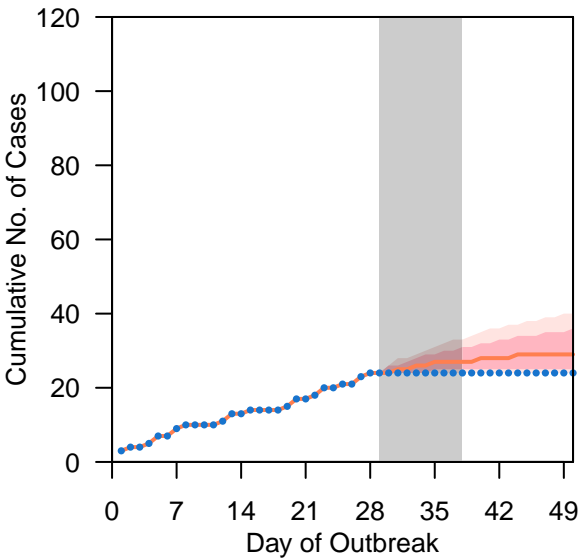

# Closure 56

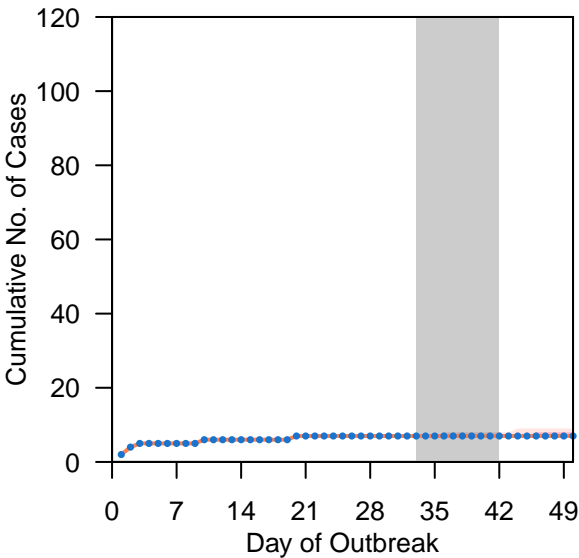



# Closure 57

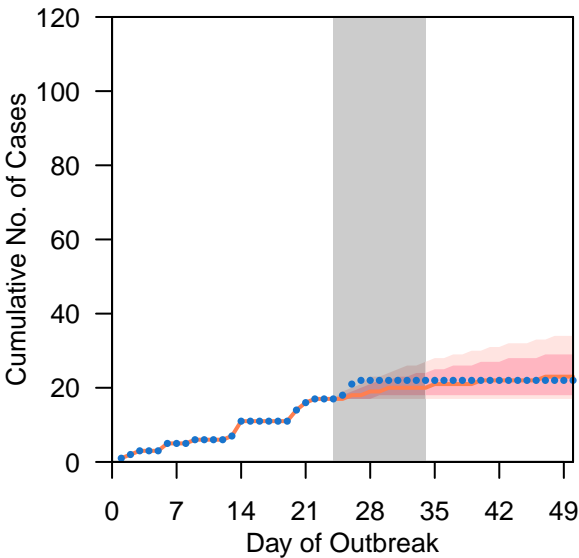

# Closure 58

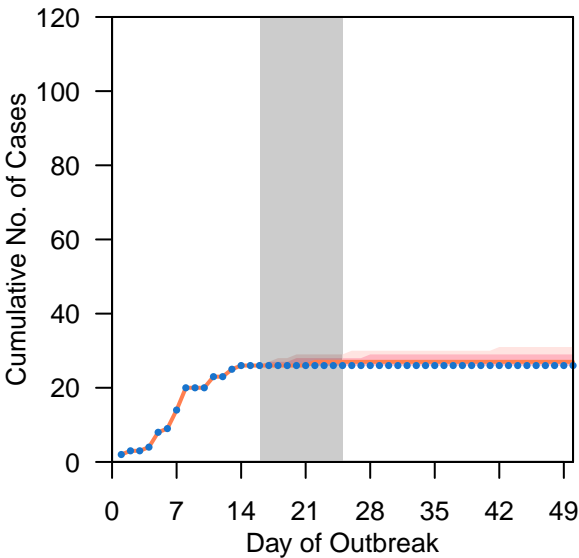

# Closure 59

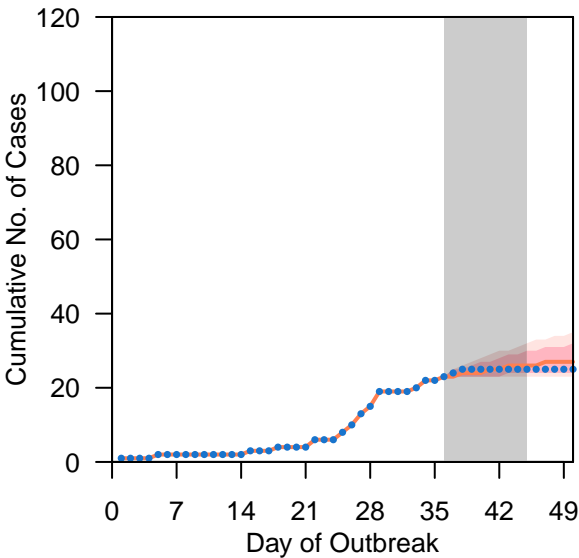

# Closure 60

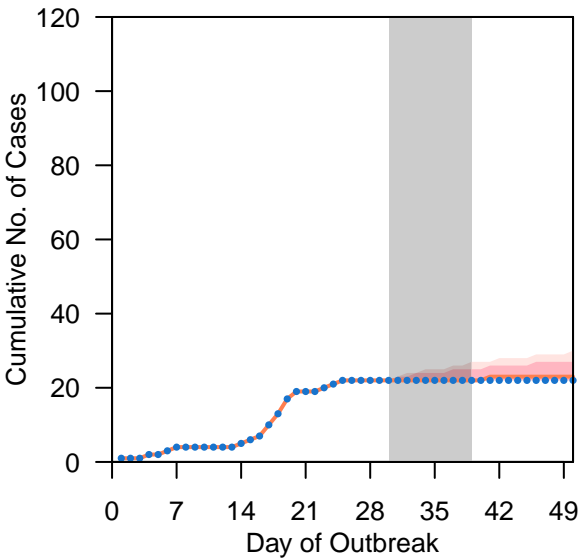

# Closure 61

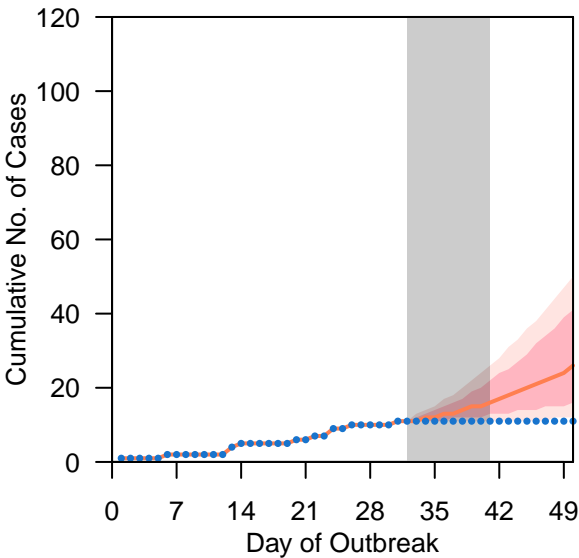

# Closure 62

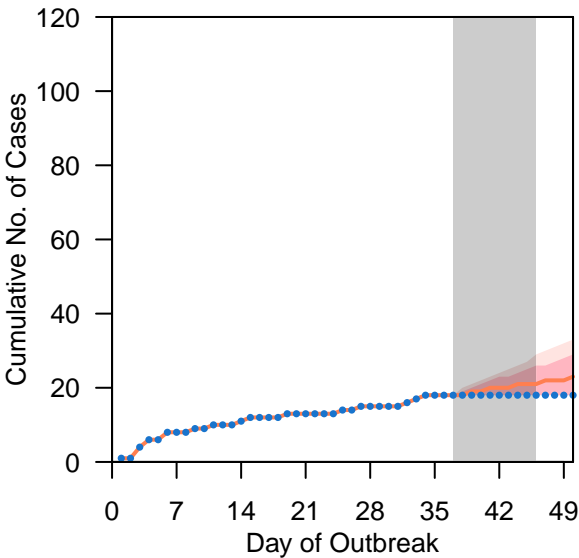

# Closure 63

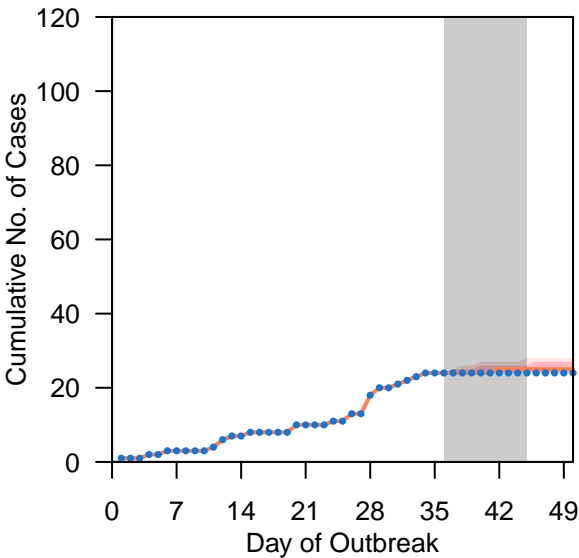

# Closure 64

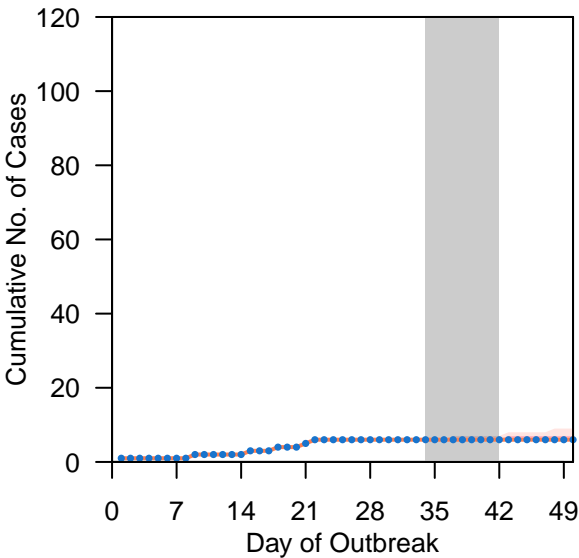



# Closure 65

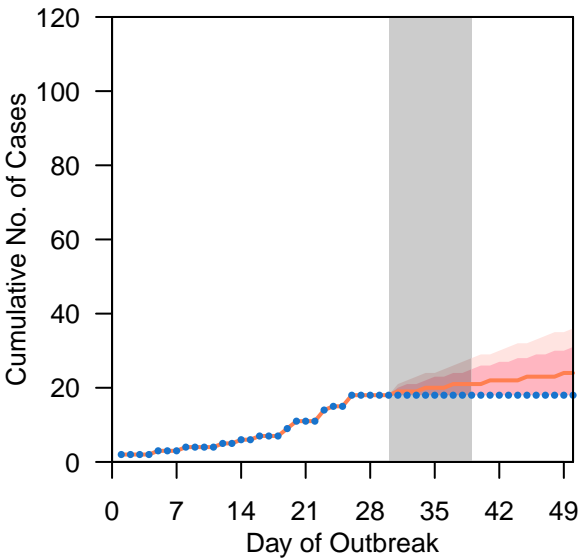

# Closure 66

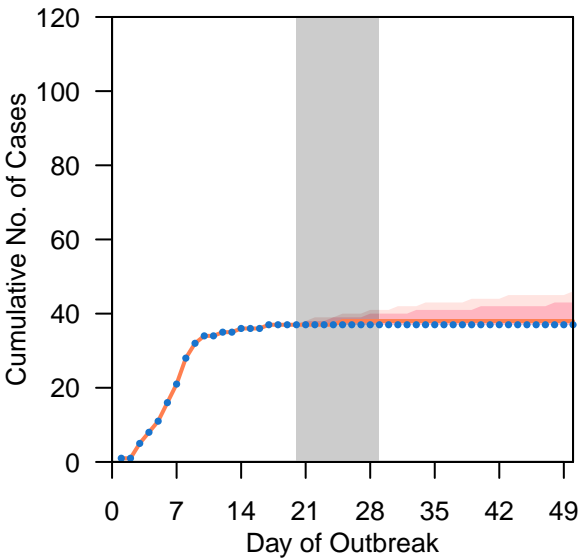

# Closure 67

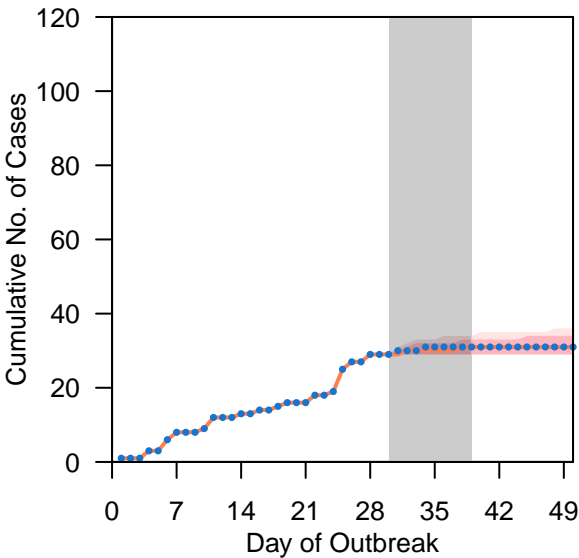

# Closure 68

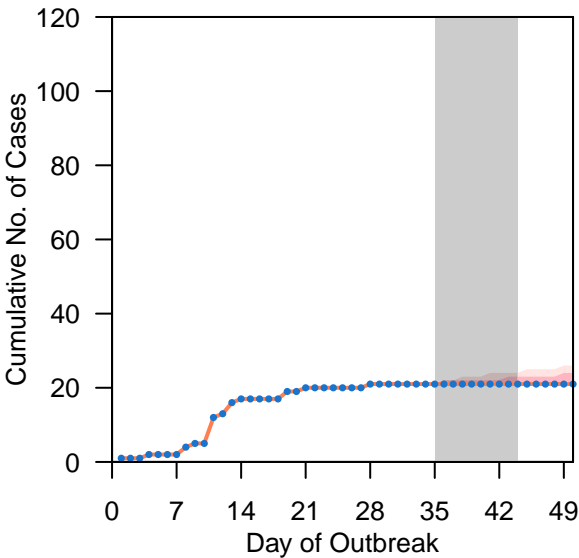

# Closure 69

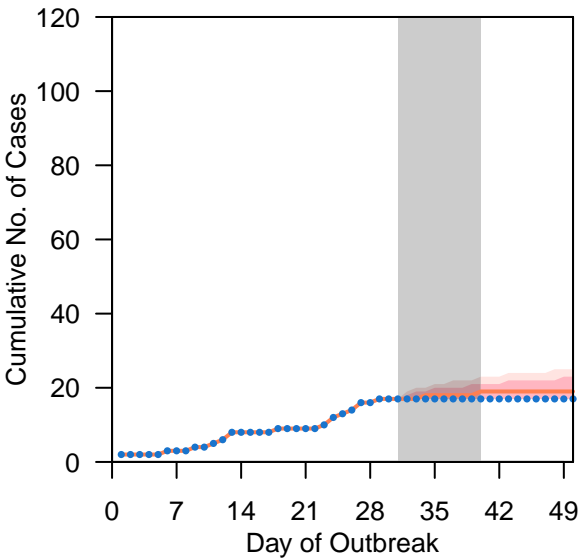

# Closure 70

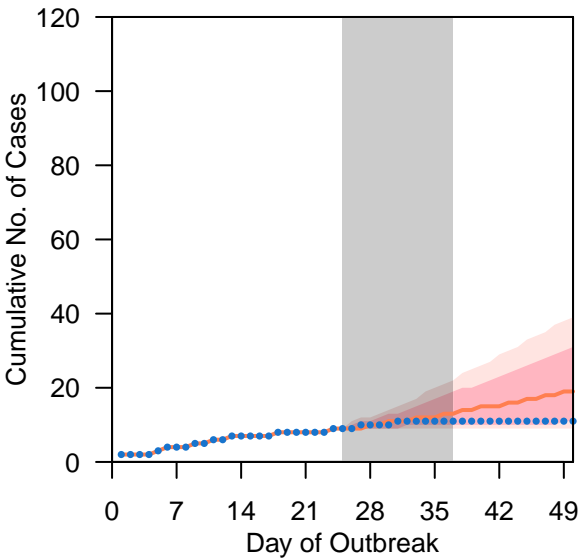

# Closure 71

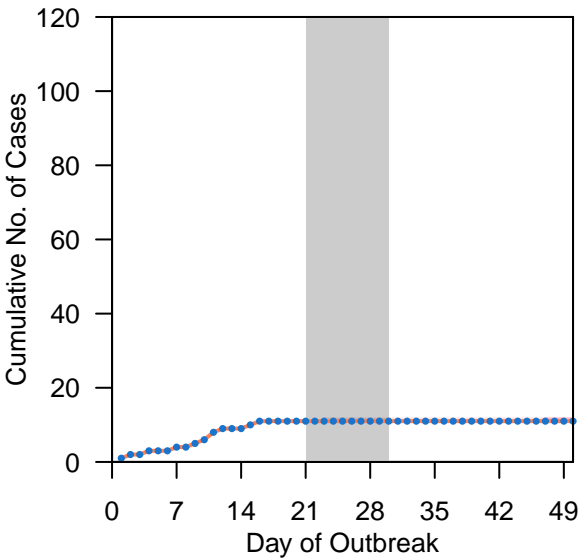

# Closure 72

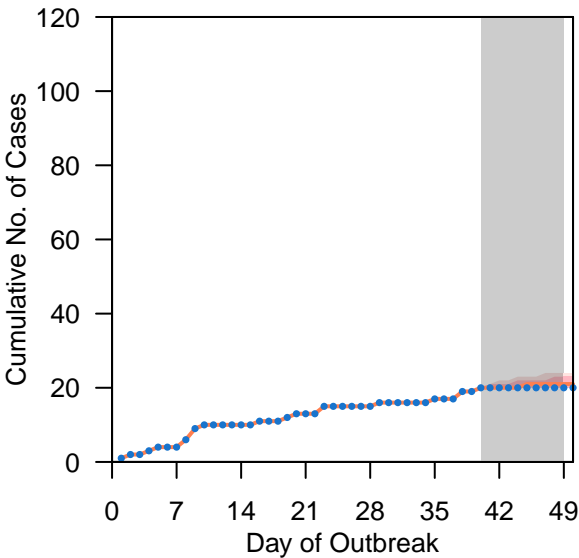



# Closure 73

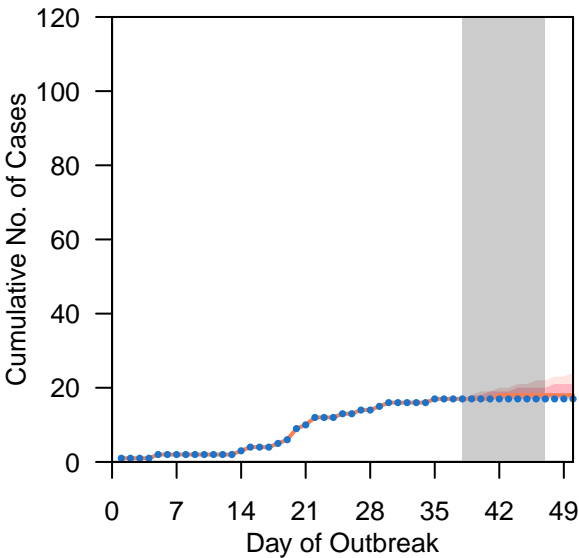

# Closure 74

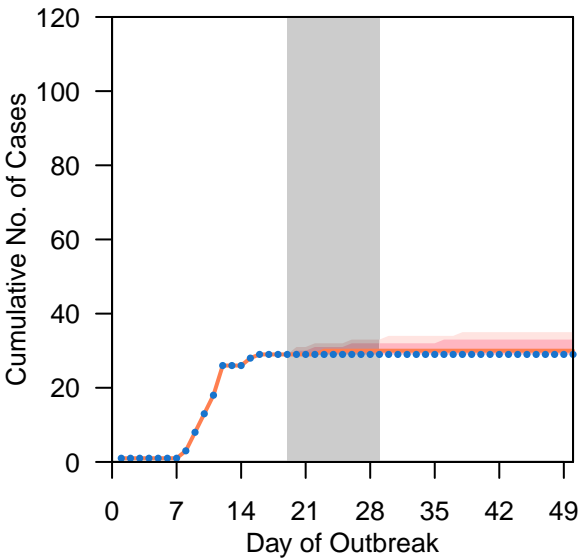

# Closure 75

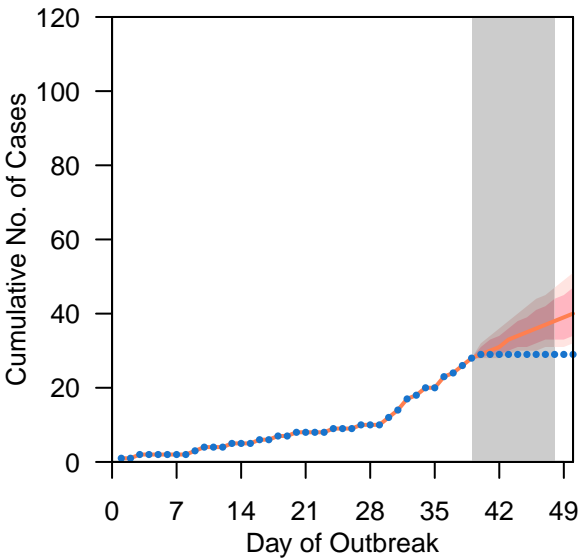

# Closure 76

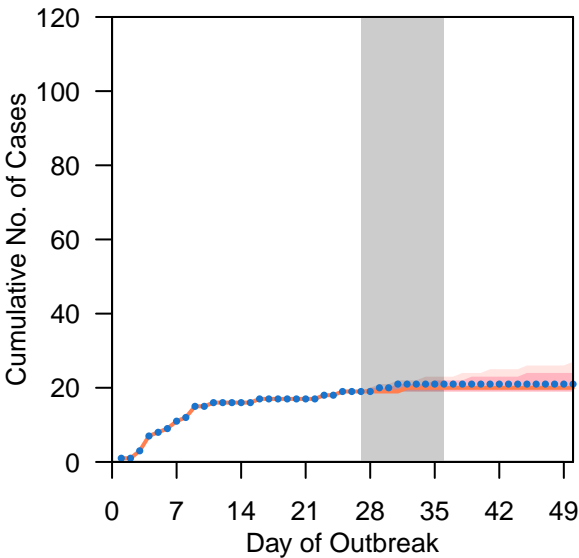

# Closure 77

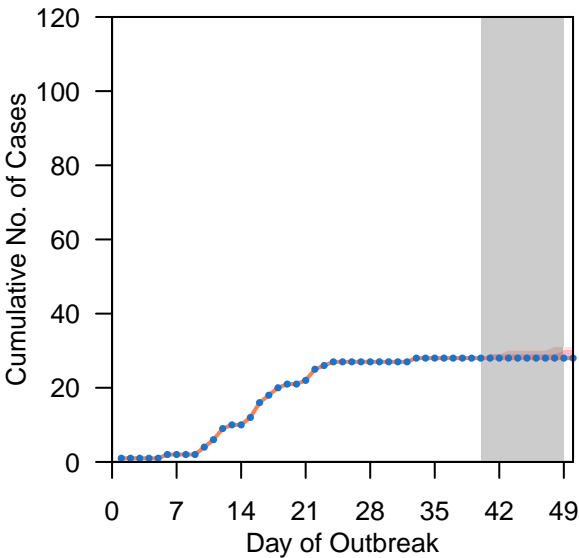

# Closure 78

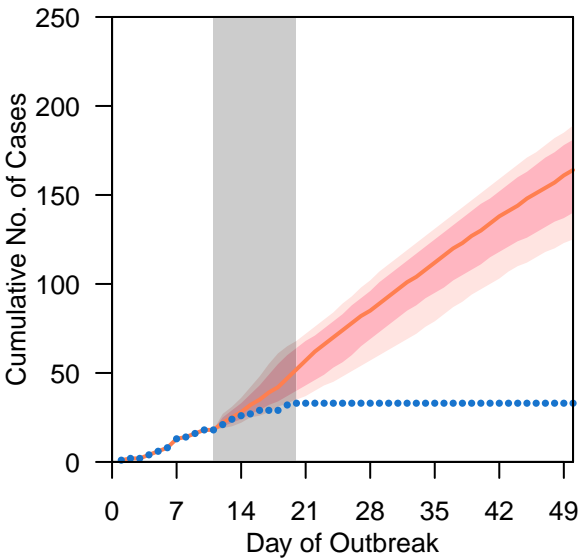

# Closure 79

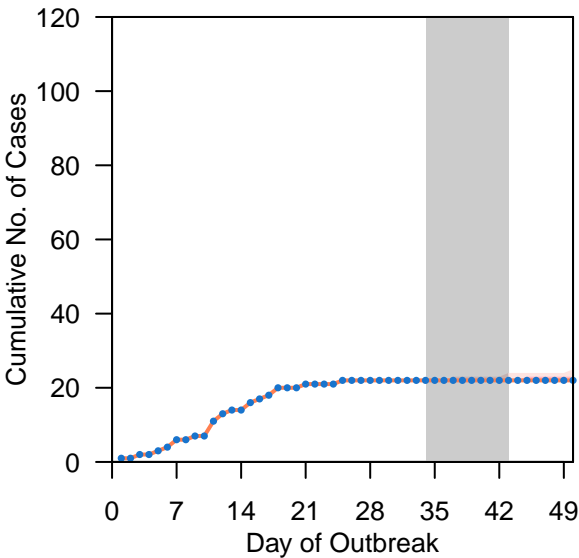

# Closure 80

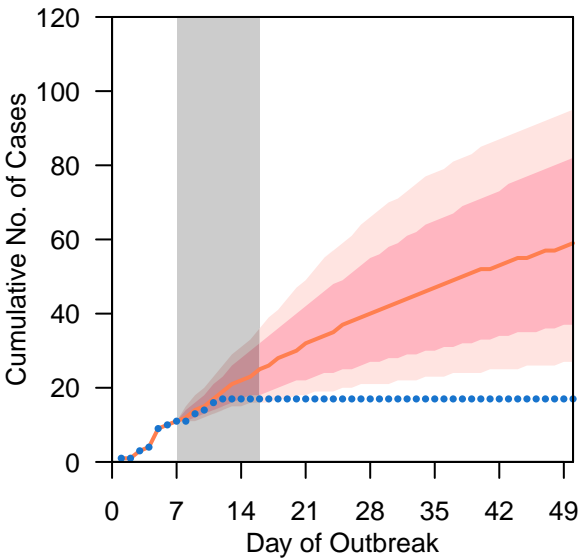



# Closure 81

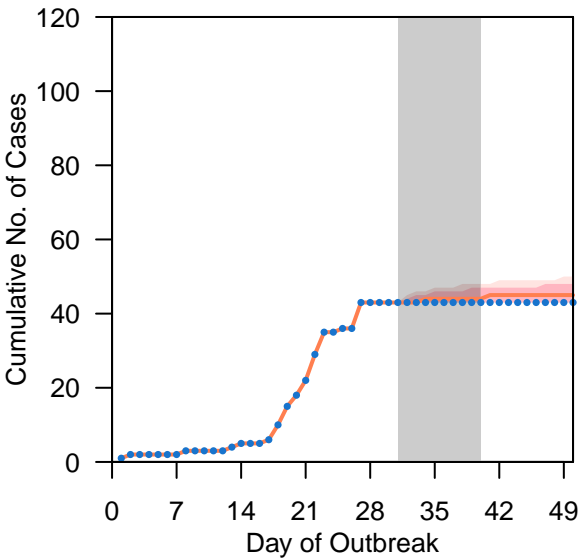

# Closure 82

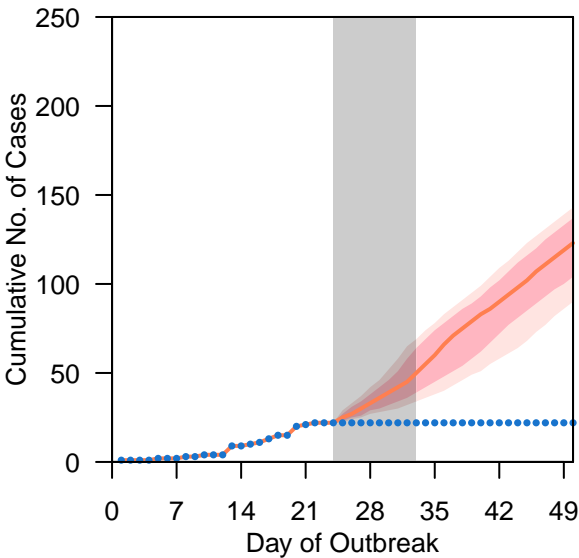

# Closure 83

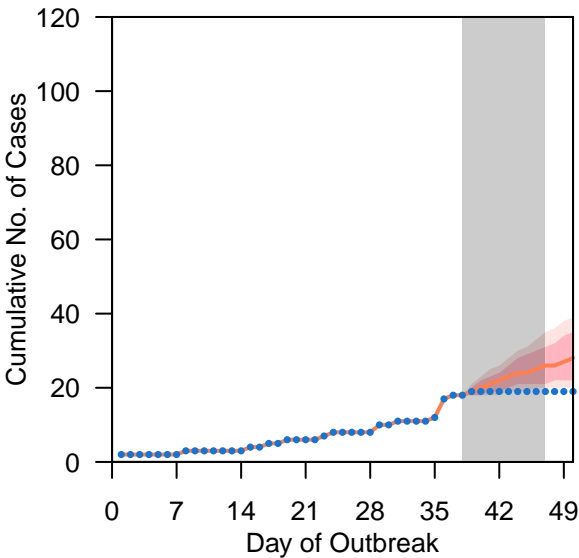

# Closure 84

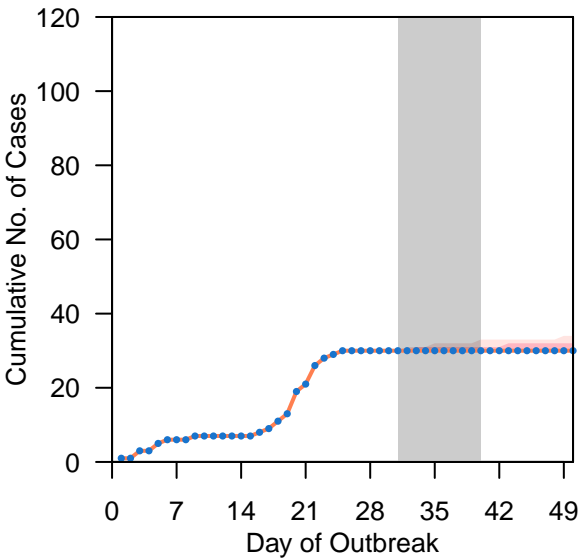

# Closure 85

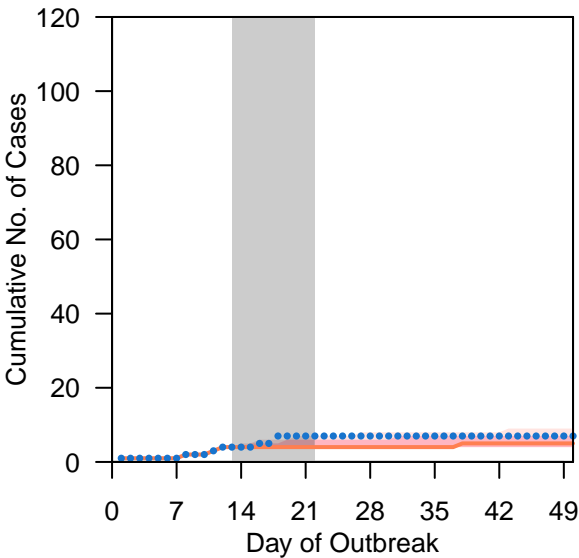

# Closure 86

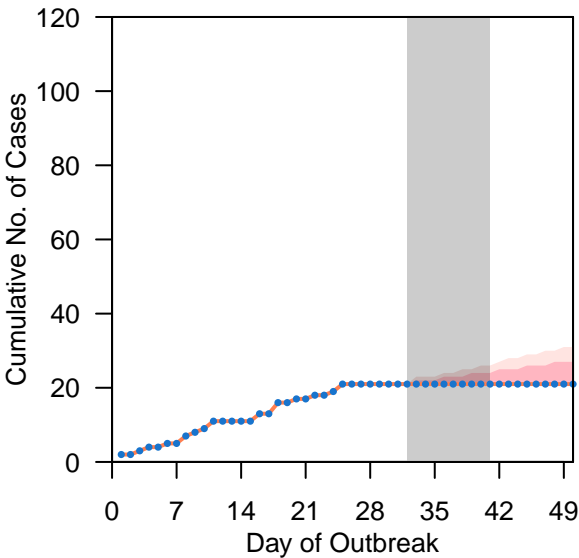

# Closure 87

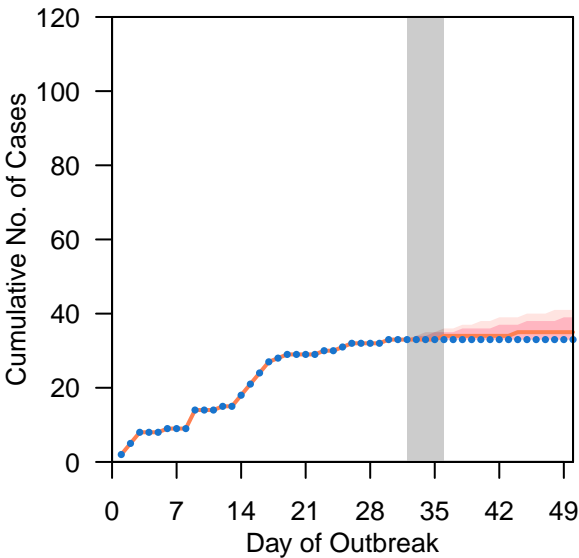

# Closure 88

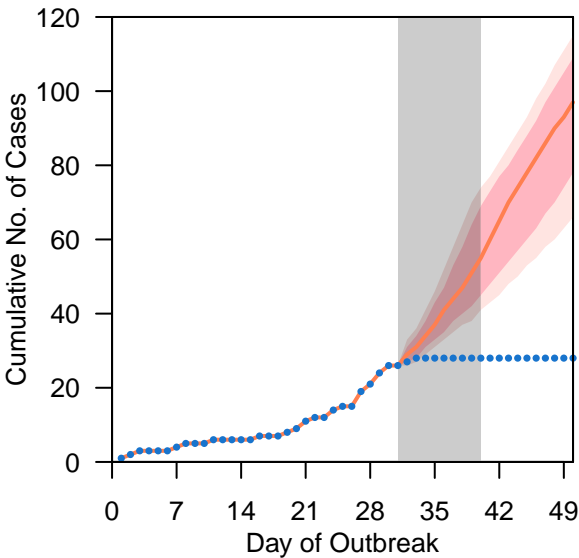



# Closure 89

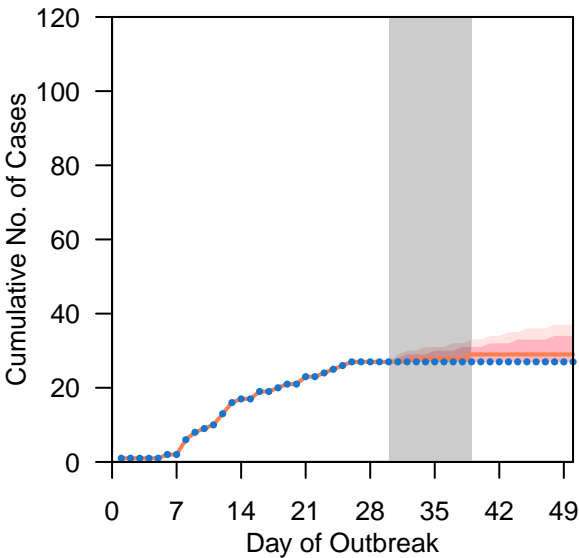

# Closure 90

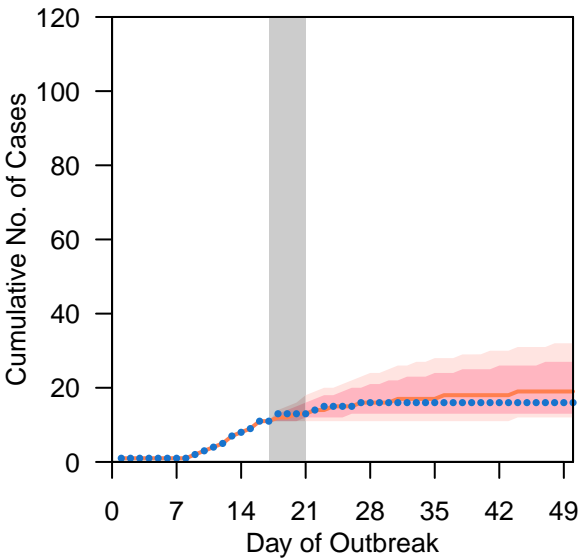

# Closure 91

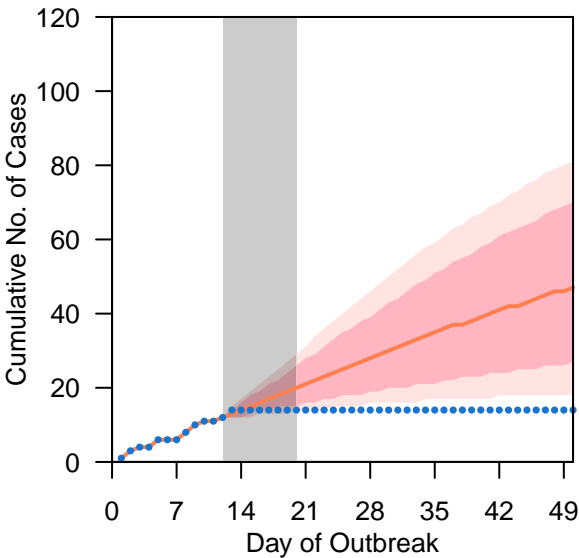

# Closure 92

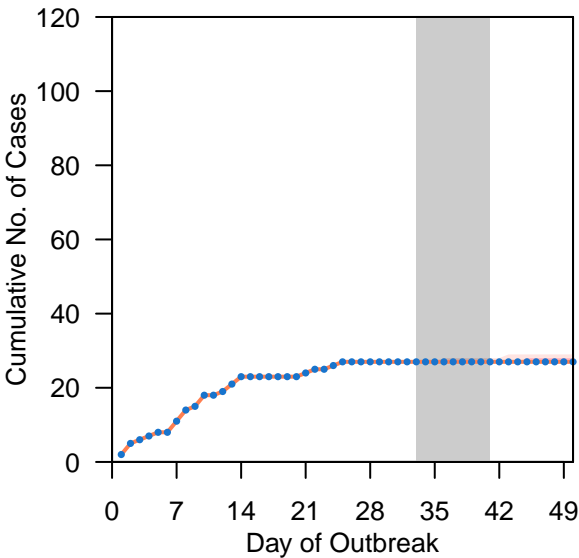

# Closure 93

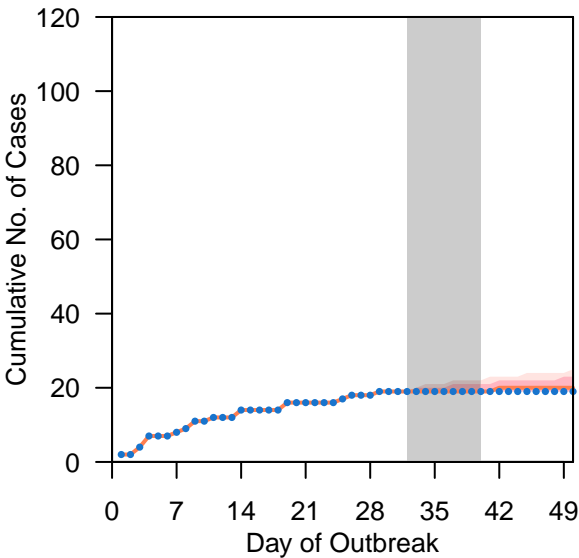

# Closure 94

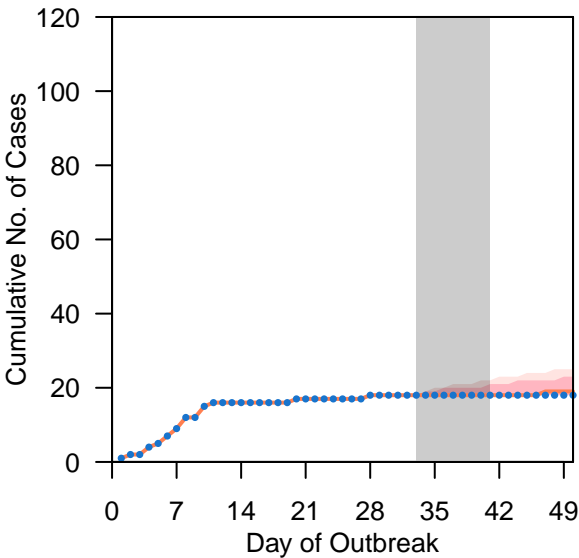

# Closure 95

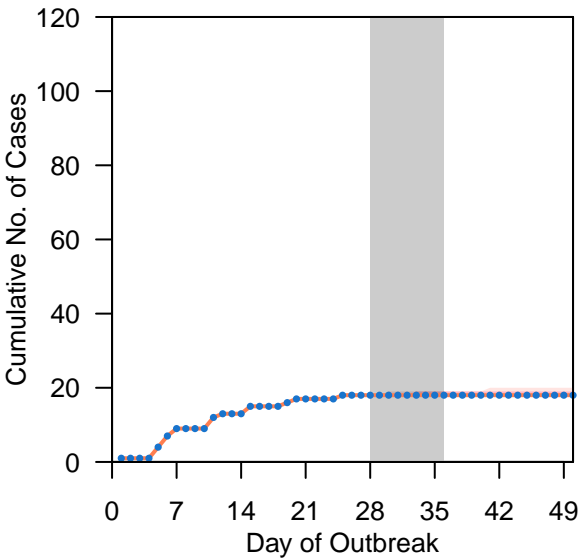

# Closure 96

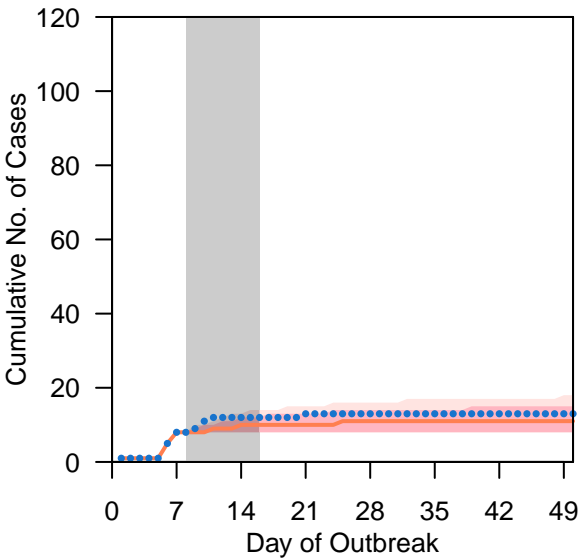



# Closure 97

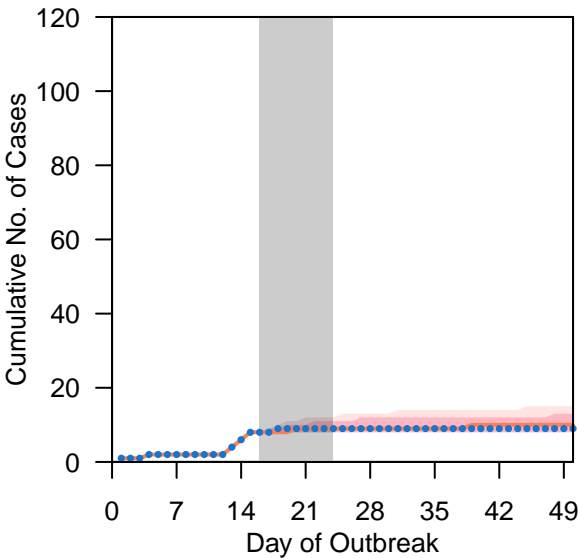

# Closure 98

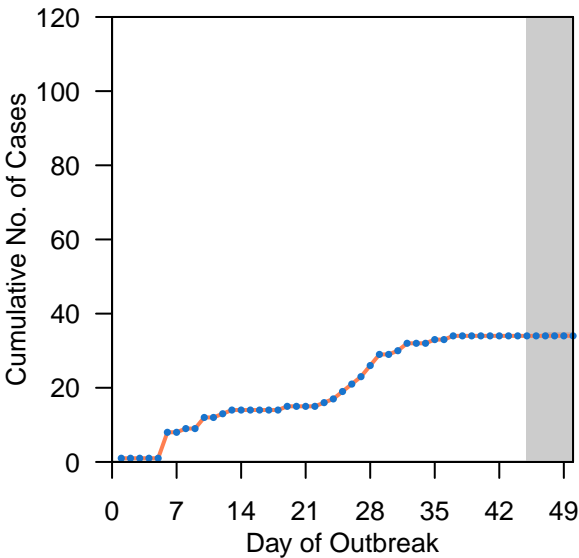

# Closure 99

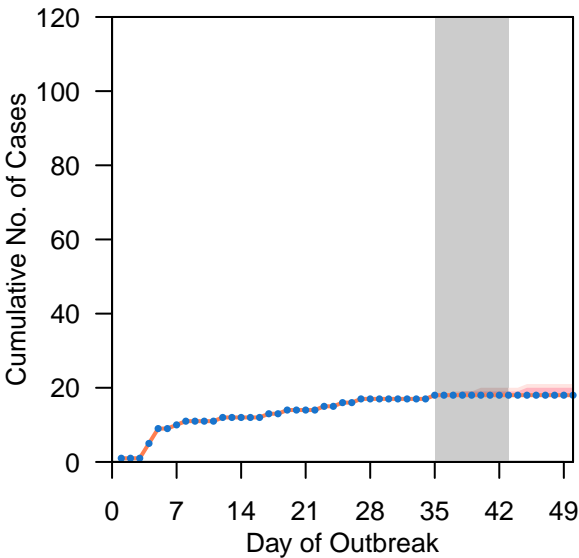

# Closure 100

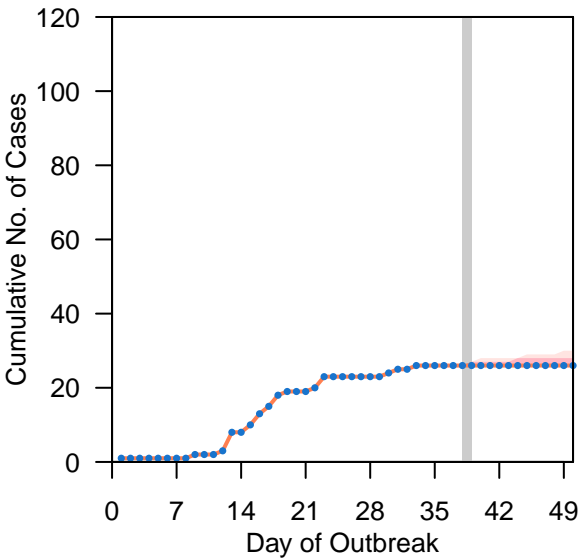

Supplement: tpmd180099.SD3.pdf [file tpmd180099.SD3.pdf]
